# Supplementary material for: Modulation of single-chain magnet behaviour in a heterometallic Fe2Co cyanide-bridged 2D sheet
Source: Royal Society of Chemistry journal article supplement (doi:10.1039/d3cc03647b), 2023-12-14
Supplement: d3cc03647b1.pdf [file d3cc03647b1.pdf]

## Modulation of single-chain-magnet behaviour in a heterometallic Fe<sub>2</sub>Co cyanide bridged 2D sheet

Ranjan Kharel, Jyoti Yadav, Sanjit Konar\*

Department of Chemistry, Indian Institute of Science Education and Research Bhopal, Bhauri, Bhopal By-pass Road, Madhya Pradesh, India- 462066.

E-mail: skonar@iiserb.ac.in

### Contents

1. Experimental Procedure
2. Physical measurements
3. Result and discussion

### 1. Experimental Procedure

The cyanide building unit Na[FeTp(CN)<sub>3</sub>] and the ligand (*E*)-1,2-bis(4-(1H-imidazol-1-yl)phenyl)diazene were prepared according to the previously reported procedures.<sup>1-4</sup> The compound **1**·3.5H<sub>2</sub>O and **2** were prepared as described below.

#### 1.1. Synthesis of Complex **1**·3.5H<sub>2</sub>O

3 mL aqueous solution of Co(BF<sub>4</sub>)<sub>2</sub>·6H<sub>2</sub>O (0.01 mmol) was taken in a test tube and layered over with 3 mL methanolic solution of Na[FeTp(CN)<sub>3</sub>] (0.02mmol) and (*E*)-1,2-bis(4-(1H-imidazol-1-yl)phenyl)diazene (0.01 mmol) using 3mL buffer solution of MeOH/H<sub>2</sub>O (1:1, v/v). The test tube was left undisturbed for two weeks to obtain red crystals of the complex.

**IR (cm<sup>-1</sup>):** ν<sub>CN</sub> = 2124, 2162 (broad) cm<sup>-1</sup> and ν<sub>BH</sub> = 2483, 2499 cm<sup>-1</sup>

#### 1.2. Synthesis of Complex **2**

3 mL aqueous solution of Zn(BF<sub>4</sub>)<sub>2</sub>·6H<sub>2</sub>O (0.01 mmol) was taken in a test tube and layered over with 3 mL methanolic solution of Na[FeTp(CN)<sub>3</sub>] (0.02mmol) and (*E*)-1,2-bis(4-(1H-imidazol-1-yl)phenyl)diazene (0.01 mmol) using 3mL buffer solution of MeOH/H<sub>2</sub>O (1:1, v/v). The test tube was left undisturbed for two weeks to obtain red crystals of the complex.

**IR (cm<sup>-1</sup>):** ν<sub>CN</sub> = 2162, 2122 and 2076 cm<sup>-1</sup> and ν<sub>BH</sub> = 2490 cm<sup>-1</sup> (broad).

### Elemental Analysis

For Complex **1**·3.5H<sub>2</sub>O: (Experimental): C = 43.91%, H = 3.38% and N = 29.40%; Calculated: C = 44.63%, H = 3.66% and N = 29.74%.

For Complex **1**: (Experimental): C = 46.82%, H = 3.28% and N = 30.63%; Calculated: C = 47.27%, H = 3.21% and N = 31.50%.

For Complex **2**: (Experimental): C = 44.59%, H = 3.63 % and N = 29.90%; Calculated: C = 44.34%, H = 3.63% and N = 29.20%.

### 2. Physical measurements

#### 2.1. Energy Dispersive X-Ray (EDX) spectrometer

The EDX data were recorded on a 50 mm<sup>2</sup> Silicon drift detector which has an Mn-K $\alpha$  resolution of 127 eV controlled by INCA (Integrated Calibration and Application Tool) software.

## **2.2. FT-Infrared Spectroscopy**

FT-IR spectra were measured by using a Perkin-Elmer Spectrum BX Spectrometer with a wavenumber ranging between 4000 cm<sup>-1</sup> - 400 cm<sup>-1</sup>.

## **2.3. UV-Visible Spectroscopy**

The solid phase UV-visible spectroscopic data was collected using Cary 100 instrument using Scan Software Version 4.20(468) scanning between wavelengths 200 nm to 1200 nm.

## **2.4. Powder XRD**

Powder X-ray diffraction (PXRD) data were collected on a PANalytical EMPYREAN instrument using Cu K $\alpha$  radiation.

## **2.5. Single Crystal X-ray Diffraction**

Intensity data were collected on a 'Bruker D8-Venture' diffractometer using a graphite monochromated Mo-K $\alpha$  radiation ( $\lambda = 0.71073$ ) and Cu- K $\alpha$  ( $\lambda = 1.54178$ ) at different temperatures. Data collections were performed using  $\phi$  and  $\omega$  scan.<sup>5,6</sup> Olex2 was used as the graphical interface and the structures were solved with olex2.solve structure solution program using Charge Flipping and refined with the ShelXT refinement package using Least-Squares minimisation.<sup>5,6</sup> All non- hydrogen atoms were refined anisotropically.

## **2.6. Magnetic measurement**

The magnetic study has been performed using a SQUID-VSM magnetometer. All samples were ground properly before measuring magnetic moment vs. temperature data, to minimize the reorientation of the crystalline particles under the applied DC field. The measurements have been performed at various applied DC fields in the temperature range of 2-300 K. The measured values were corrected for the experimentally measured contribution of the sample holder, and the derived susceptibilities were corrected for the diamagnetism contribution of the samples, estimated from Pascal's tables.

## **2.7. Thermogravimetric Analysis**

The Thermogravimetric Analysis was performed on a PerkinElmer instrument at a scan rate of 5 K/min, under dry N<sub>2</sub> atmosphere.

## **2.8. Mössbauer Studies**

<sup>57</sup>Fe Mossbauer measurements were carried out in transmission mode with <sup>57</sup>Co radioactive source in constant acceleration mode using standard PC-based Mossbauer spectrometer equipped with Wissel velocity drive. Velocity calibration of the spectrometer was done with natural iron absorber at room temperature. Sample was mounted in Janis make cryostat for low temperature measurements. The spectra was analysed with NORMOS program.

### 3. Result and Discussions

#### 3.1. EDX:

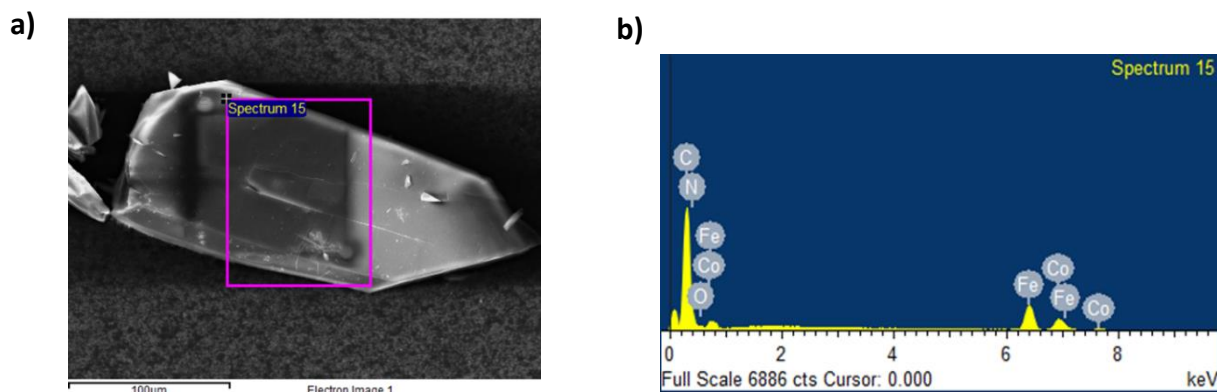

| Element | Weight% | Atomic% |
|---------|---------|---------|
| C K     | 51.75   | 62.43   |
| N K     | 28.35   | 29.33   |
| O K     | 4.89    | 4.43    |
| Co K    | 5.20    | 1.28    |
| Fe K    | 9.80    | 2.54    |
| Totals  | 100.00  |         |

Figure S1. EDX (elemental contents) of complex 1·3.5H<sub>2</sub>O

#### 3.2. Infrared spectroscopy:

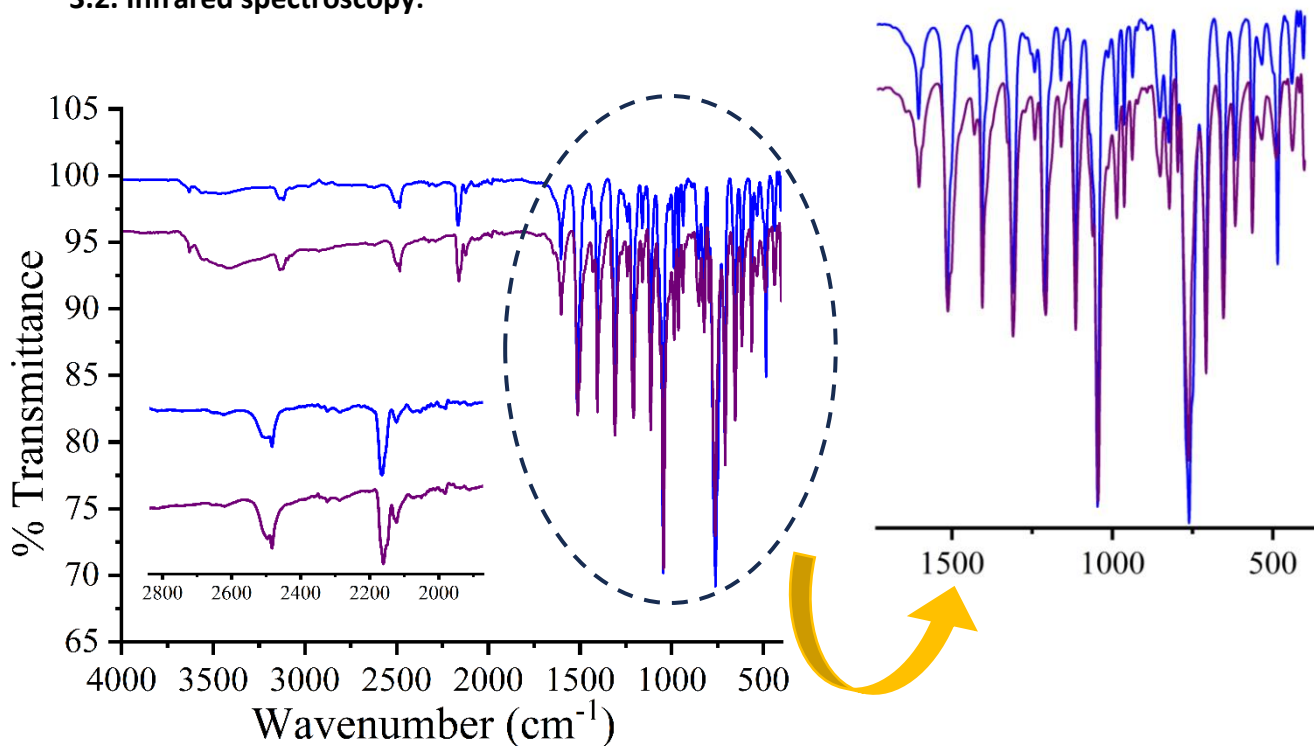

Figure S2: FT-IR spectra of crystal obtained through layer-by-layer technique (purple) and product obtained on direct mixing (blue). Inset indicates identical  $\nu_{CN}$  peaks (2100-2200 cm<sup>-1</sup>) and  $\nu_{BH}$  peaks for both the samples. The identical spectra in the fingerprint region confirm that the products are identical.

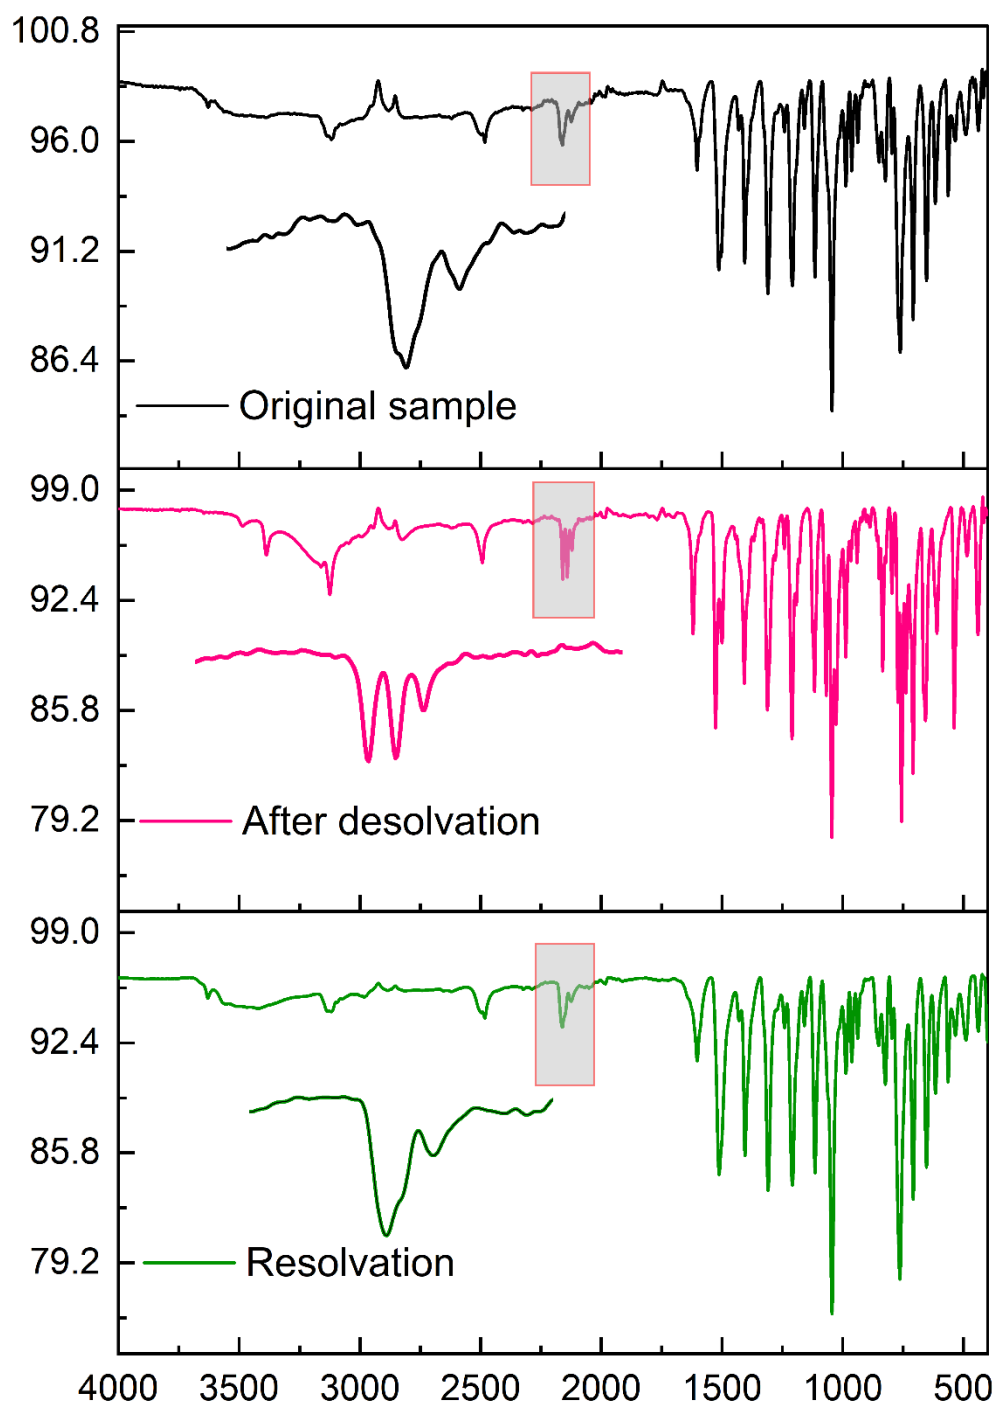

**Figure S3:** FT-IR for  $1 \cdot 3.5\text{H}_2\text{O}$  at 300 K, Inset shows the change in  $\nu_{\text{CN}}$  stretching frequency. The broad cyanide peaks as highlighted are well resolved after removal of the water molecules and on subjecting to water for a day, the original spectrum is regained. The two bands at 2160 and 2124  $\text{cm}^{-1}$  corresponding to the bridging  $\nu_{\text{CN}}$  of  $[\text{Fe}^{\text{III}}_{\text{LS}}(\mu\text{-CN})\text{Co}^{\text{II}}_{\text{HS}}]$  linkages and terminal cyanide of  $[\text{FeTp}(\text{CN})_3]^-$  units respectively.

### 3.3. UV-Vis spectroscopy:

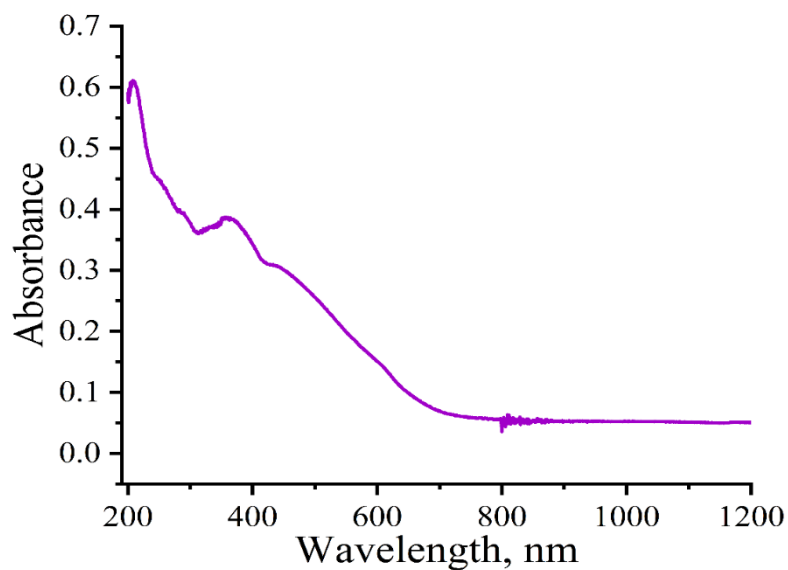

**Figure S4:** Solid-state UV-Vis-NIR absorption spectra for **1**·3.5H<sub>2</sub>O at 300 K. The band at 438 nm, stands for the metal-to-metal charge transfer (MMCT) from Co<sup>II</sup><sub>HS</sub> to Fe<sup>III</sup><sub>LS</sub>, thus confirming the presence of only paramagnetic {Fe<sup>III</sup><sub>LS</sub>(μ-CN)Co<sup>II</sup><sub>HS</sub>} units in the chain at 300 K.

### 3.4. Powder XRD:

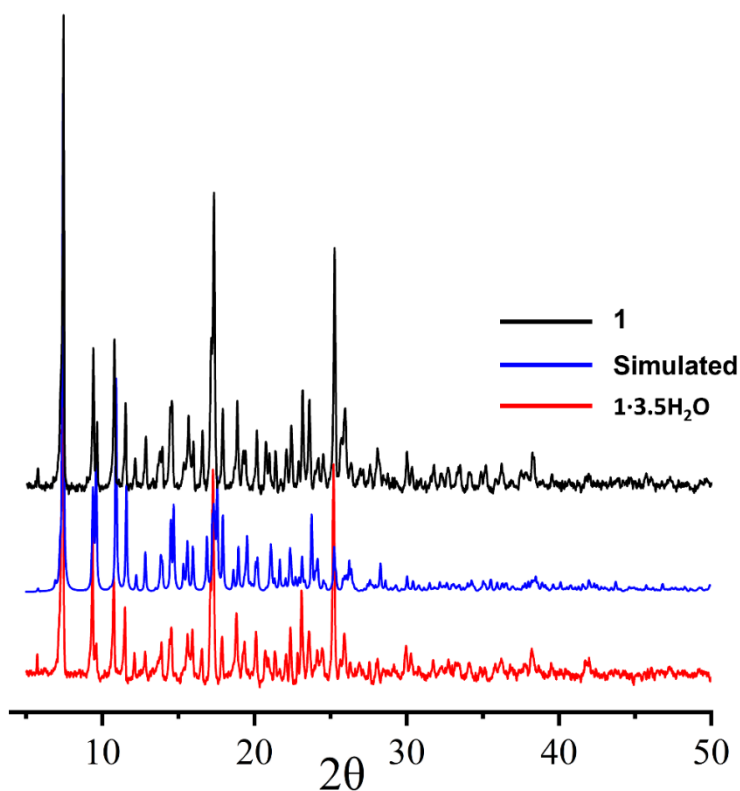

**Figure S5:** Powder X-ray diffraction pattern of **1**·3.5H<sub>2</sub>O and **1**. Black and red lines represent the experimental values, and the blue line represents the calculated pattern from the SC-XRD data.

### 3.5. Structural details:

**Table S1.** The unit cell and refinement parameters of complexes **1**·3.5H<sub>2</sub>O (103 K, 245 K), **1** and **2** (100 K).

| Complex                            | 1·3.5H <sub>2</sub> O                                                                               |                                                                                                   | 1                                                                                | 2                                                                                                    |
|------------------------------------|-----------------------------------------------------------------------------------------------------|---------------------------------------------------------------------------------------------------|----------------------------------------------------------------------------------|------------------------------------------------------------------------------------------------------|
|                                    | 103 K                                                                                               | 245 K                                                                                             | 100 K                                                                            | 100 K                                                                                                |
| Identification code                | Complex-1_103K                                                                                      | Complex-1_245K                                                                                    | Complex-1_desol                                                                  | Complex-2_Zn                                                                                         |
| CCDC No.                           | 2270783                                                                                             | 2270789                                                                                           | 2270788                                                                          | 2270790                                                                                              |
| Empirical formula                  | C <sub>42</sub> H <sub>35.7</sub> B <sub>2</sub> CoFe <sub>2</sub> N <sub>24</sub> O <sub>3.5</sub> | C <sub>42</sub> H <sub>33</sub> B <sub>2</sub> CoFe <sub>2</sub> N <sub>24</sub> O <sub>3.5</sub> | C <sub>42</sub> H <sub>34</sub> B <sub>2</sub> CoFe <sub>2</sub> N <sub>24</sub> | C <sub>42.5</sub> H <sub>38.5</sub> B <sub>2</sub> Fe <sub>2</sub> N <sub>24</sub> O <sub>4</sub> Zn |
| Formula weight                     | 1124.92                                                                                             | 1122.17                                                                                           | 1067.18                                                                          | 1148.16                                                                                              |
| Crystal system                     | triclinic                                                                                           | triclinic                                                                                         | triclinic                                                                        | triclinic                                                                                            |
| Space group                        | P-1                                                                                                 | P-1                                                                                               | P-1                                                                              | P-1                                                                                                  |
| a/Å                                | 12.176(4)                                                                                           | 12.328(6)                                                                                         | 11.9253(7)                                                                       | 12.3580(4)                                                                                           |
| b/Å                                | 13.726(4)                                                                                           | 13.811(7)                                                                                         | 13.8081(8)                                                                       | 13.8278(5)                                                                                           |
| c/Å                                | 16.323(5)                                                                                           | 16.391(8)                                                                                         | 16.3778(9)                                                                       | 13.8278(5)                                                                                           |
| α/°                                | 68.781(9)                                                                                           | 68.709(14)                                                                                        | 68.189(3)                                                                        | 68.011(2)                                                                                            |
| β/°                                | 86.578(10)                                                                                          | 86.925(15)                                                                                        | 86.117(4)                                                                        | 86.398(2)                                                                                            |
| γ/°                                | 79.806(10)                                                                                          | 79.548(16)                                                                                        | 80.393(4)                                                                        | 78.696(2)                                                                                            |
| Volume/Å <sup>3</sup>              | 2502.9(14)                                                                                          | 2557(2)                                                                                           | 2468.6(3)                                                                        | 2556.72(15)                                                                                          |
| Z                                  | 2                                                                                                   | 2                                                                                                 | 2                                                                                | 2                                                                                                    |
| ρ <sub>calc</sub> /cm <sup>3</sup> | 1.493                                                                                               | 1.458                                                                                             | 1.436                                                                            | 1.491                                                                                                |
| μ/mm <sup>-1</sup>                 | 0.966                                                                                               | 0.946                                                                                             | 7.732                                                                            | 5.600                                                                                                |
| F(000)                             | 1145.0                                                                                              | 1140.0                                                                                            | 1086.0                                                                           | 1171.0                                                                                               |
| Crystal size/mm <sup>3</sup>       | 0.23 × 0.12 × 0.07                                                                                  | 0.23 × 0.12 × 0.07                                                                                | 0.27 × 0.15 × 0.09                                                               | 0.25 × 0.13 × 0.09                                                                                   |
| Radiation                          | MoKα (λ = 0.71073)                                                                                  | MoKα (λ = 0.71073)                                                                                | CuKα (λ = 1.54178)                                                               | CuKα (λ = 1.54178)                                                                                   |
| 2θ range for data collection/°     | 4.402 to 53.516                                                                                     | 4.86 to 53.03                                                                                     | 5.812 to 127.974                                                                 | 7.016 to 133.674                                                                                     |
| Index ranges                       | -15 ≤ h ≤ 15, -17 ≤ k ≤ 17, -20 ≤ l ≤ 20                                                            | -15 ≤ h ≤ 15, -17 ≤ k ≤ 17, -20 ≤ l ≤ 20                                                          | -13 ≤ h ≤ 13, -16 ≤ k ≤ 16, -19 ≤ l ≤ 19                                         | -14 ≤ h ≤ 14, -16 ≤ k ≤ 16, -18 ≤ l ≤ 19                                                             |
| Reflections collected              | 31092                                                                                               | 40692                                                                                             | 51522                                                                            | 111544                                                                                               |
| Independent reflections            | 10307 [R <sub>int</sub> = 0.1160, R <sub>sigma</sub> = 0.1473]                                      | 10538 [R <sub>int</sub> = 0.1141, R <sub>sigma</sub> = 0.1175]                                    | 7905 [R <sub>int</sub> = 0.0943, R <sub>sigma</sub> = 0.0618]                    | 8958 [R <sub>int</sub> = 0.0618, R <sub>sigma</sub> = 0.0275]                                        |
| Data/restraints/parameters         | 10307/0/722                                                                                         | 10538/0/747                                                                                       | 7905/0/643                                                                       | 8958/0/751                                                                                           |
| Goodness-of-fit on F <sup>2</sup>  | 0.980                                                                                               | 0.988                                                                                             | 1.052                                                                            | 1.060                                                                                                |
| Final R indexes [I ≥ 2σ(I)]        | R <sub>1</sub> = 0.0691, wR <sub>2</sub> = 0.1502                                                   | R <sub>1</sub> = 0.0626, wR <sub>2</sub> = 0.1385                                                 | R <sub>1</sub> = 0.0459, wR <sub>2</sub> = 0.1037                                | R <sub>1</sub> = 0.0469, wR <sub>2</sub> = 0.1135                                                    |
| Final R indexes [all data]         | R <sub>1</sub> = 0.1434, wR <sub>2</sub> = 0.1890                                                   | R <sub>1</sub> = 0.1331, wR <sub>2</sub> = 0.1736                                                 | R <sub>1</sub> = 0.0673, wR <sub>2</sub> = 0.1130                                | R <sub>1</sub> = 0.0522, wR <sub>2</sub> = 0.1162                                                    |

**Table S2.** Selected bond lengths (Å) and angles (°) of complexes **1**·3.5H<sub>2</sub>O (103 K, 245 K), **1** and **2** (100 K).

|                                        |            |             |           |
|----------------------------------------|------------|-------------|-----------|
| Complex-1_103K                         |            |             |           |
| <b>Bond Length (Å)</b>                 |            |             |           |
| Co1-N9 <sup>4</sup>                    | 2.080(5)   | Fe1-N1      | 1.972(5)  |
| Co1-N9                                 | 2.080(5)   | Fe1-N3      | 1.974(5)  |
| Co1-N18 <sup>5</sup>                   | 2.091(5)   | Fe1-N5      | 1.954(5)  |
| Co1-N18 <sup>6</sup>                   | 2.091(5)   | Fe1-C12     | 1.901(7)  |
| Co1-N10                                | 2.092(5)   | Fe1-C10     | 1.893(6)  |
| Co1-N10 <sup>4</sup>                   | 2.092(5)   | Fe1-C11     | 1.924(7)  |
| Co2-N7 <sup>1</sup>                    | 2.115(5)   | Fe2-N21     | 1.975(5)  |
| Co2-N7 <sup>2</sup>                    | 2.115(5)   | Fe2-N19     | 1.963(5)  |
| Co2-N16                                | 2.064(5)   | Fe2-N23     | 1.962(5)  |
| Co2-N16 <sup>3</sup>                   | 2.064(5)   | Fe2-C33     | 1.903(7)  |
| Co2-N15                                | 2.072(5)   | Fe2-C31     | 1.930(6)  |
| Co2-N15 <sup>3</sup>                   | 2.072(5)   | Fe2-C32     | 1.924(7)  |
| <b>Bond Angle (°)</b>                  |            |             |           |
| N9-Co1-N9 <sup>4</sup>                 | 180.0      | N1-Fe1-N3   | 88.5(2)   |
| N9-Co1-N18 <sup>5</sup>                | 88.61(19)  | N5-Fe1-N1   | 88.0(2)   |
| N9 <sup>4</sup> -Co1-N18 <sup>6</sup>  | 88.61(19)  | N5-Fe1-N3   | 88.47(19) |
| N9-Co1-N18 <sup>6</sup>                | 91.39(19)  | C12-Fe1-N1  | 178.0(2)  |
| N9 <sup>4</sup> -Co1-N18 <sup>5</sup>  | 91.39(19)  | C12-Fe1-N3  | 89.6(2)   |
| N9 <sup>4</sup> -Co1-N10 <sup>4</sup>  | 90.63(19)  | C12-Fe1-N5  | 91.1(2)   |
| N9-Co1-N10 <sup>4</sup>                | 89.37(19)  | C12-Fe1-C11 | 90.2(3)   |
| N9 <sup>4</sup> Co1N10                 | 89.37(19)  | C10-Fe1-N1  | 97.6(2)   |
| N9Co1N10                               | 90.63(19)  | C10-Fe1-N3  | 173.7(2)  |
| N18 <sup>5</sup> Co1N18 <sup>6</sup>   | 180.0(3)   | C10-Fe1-N5  | 90.5(2)   |
| N18 <sup>6</sup> Co1N10 <sup>4</sup>   | 89.62(19)  | C10-Fe1-C12 | 84.2(2)   |
| N18 <sup>5</sup> Co1N10 <sup>4</sup>   | 90.38(19)  | C10-Fe1-C11 | 89.4(2)   |
| N18 <sup>6</sup> Co1N10                | 90.38(19)  | C11-Fe1-N1  | 90.7(2)   |
| N18 <sup>5</sup> Co1N10                | 89.62(19)  | C11-Fe1-N3  | 91.7(2)   |
| N10 <sup>4</sup> Co1N10                | 180.0      | C11-Fe1-N5  | 178.7(3)  |
| N7 <sup>1</sup> -Co2-N7 <sup>2</sup>   | 180.0      | N19-Fe2-N21 | 87.9(2)   |
| N16-Co2-N7 <sup>2</sup>                | 87.32(18)  | N23-Fe2-N21 | 88.5(2)   |
| N16 <sup>3</sup> -Co2-N7 <sup>2</sup>  | 92.68(18)  | N23-Fe2-N19 | 89.4(2)   |
| N16 <sup>3</sup> -Co2-N7 <sup>1</sup>  | 87.32(18)  | C33-Fe2-N21 | 92.4(2)   |
| N16-Co2-N7 <sup>1</sup>                | 92.68(18)  | C33-Fe2-N19 | 92.5(2)   |
| N16 <sup>3</sup> -Co2-N16              | 180.0      | C33-Fe2-N23 | 177.9(2)  |
| N16-Co2-N15 <sup>3</sup>               | 90.4(3)    | C33-Fe2-C31 | 85.6(3)   |
| N16-Co2-N15                            | 89.5(3)    | C33-Fe2-C32 | 87.7(3)   |
| N16 <sup>3</sup> -Co2-N15 <sup>3</sup> | 89.5(3)    | C31-Fe2-N21 | 90.9(2)   |
| N16 <sup>3</sup> -Co2-N15              | 90.5(3)    | C31-Fe2-N19 | 177.7(2)  |
| N15 <sup>3</sup> -Co2-N7 <sup>2</sup>  | 88.7(2)    | C31-Fe2-N23 | 92.5(2)   |
| N15-Co2-N7 <sup>1</sup>                | 88.7(2)    | C32-Fe2-N21 | 179.9(3)  |
| N15 <sup>3</sup> -Co2-N7 <sup>1</sup>  | 91.3(2)    | C32-Fe2-N19 | 92.2(2)   |
| N15-Co2-N7 <sup>2</sup>                | 91.3(2)    | C32-Fe2-N23 | 91.4(3)   |
| N15 <sup>3</sup> -Co2-N15              | 180.00(17) | C32-Fe2-C31 | 89.1(3)   |

|                                         |           |             |            |
|-----------------------------------------|-----------|-------------|------------|
| Complex-1_245K                          |           |             |            |
| <b>Bond Length Å</b>                    |           |             |            |
| Co1-N9 <sup>4</sup>                     | 2.101(5)  | Fe1-N1      | 1.979(4)   |
| Co1-N9                                  | 2.101(5)  | Fe1-N3      | 1.976(4)   |
| Co1-N18 <sup>5</sup>                    | 2.116(4)  | Fe1-N5      | 1.959(5)   |
| Co1-N18 <sup>6</sup>                    | 2.116(4)  | Fe1-C12     | 1.900(6)   |
| Co1-N10                                 | 2.117(4)  | Fe1-C10     | 1.916(5)   |
| Co1-N10 <sup>4</sup>                    | 2.117(4)  | Fe1-C11     | 1.915(6)   |
| Co2-N7 <sup>1</sup>                     | 2.138(4)  | Fe2-N21     | 1.976(5)   |
| Co2-N7 <sup>2</sup>                     | 2.138(4)  | Fe2-N19     | 1.962(5)   |
| Co2-N16                                 | 2.101(5)  | Fe2-N23     | 1.965(4)   |
| Co2-N16 <sup>3</sup>                    | 2.101(5)  | Fe2-C33     | 1.912(6)   |
| Co2-N15                                 | 2.140(2)  | Fe2-C31     | 1.910(6)   |
| Co2-N15 <sup>3</sup>                    | 2.140(2)  | Fe2-C32     | 1.916(6)   |
| Co2-N15A                                | 2.113(14) |             |            |
| Co2-N15A <sup>3</sup>                   | 2.113(15) |             |            |
| <b>Bond Angle (°)</b>                   |           |             |            |
| N18 <sup>2</sup> -Co1-N-18              | 180.0     | N3-Fe1-N1   | 88.74(17)  |
| N18 <sup>2</sup> -Co1-N10 <sup>4</sup>  | 89.81(16) | N5-Fe1-N1   | 88.18(18)  |
| N18-Co1-N10 <sup>4</sup>                | 90.19(16) | N5-Fe1-N3   | 88.04(18)  |
| N18-Co1-N10 <sup>5</sup>                | 89.81(16) | C12-Fe1-N1  | 178.0(2)   |
| N18 <sup>2</sup> -Co1-N10 <sup>5</sup>  | 90.19(16) | C12-Fe1-N3  | 89.64(19)  |
| N9 <sup>2</sup> -Co1-N18                | 91.59(16) | C12-Fe1-N5  | 90.6(2)    |
| N9-Co1-N18 <sup>2</sup>                 | 91.60(16) | C12-Fe1-C10 | 84.8(2)    |
| N9-Co1-N18                              | 88.40(16) | C12-Fe1-C11 | 90.3(2)    |
| N9 <sup>2</sup> -Co1-N18 <sup>2</sup>   | 88.41(16) | C10-Fe1-N1  | 96.83(19)  |
| N9 <sup>2</sup> -Co1-N9                 | 180.0     | C10-Fe1-N3  | 174.15(18) |
| N9-Co1-N10 <sup>4</sup>                 | 89.74(17) | C10-Fe1-N5  | 90.33(19)  |
| N9-Co1-N10 <sup>5</sup>                 | 90.26(17) | C11-Fe1-N1  | 90.9(2)    |
| N9 <sup>2</sup> -Co1-N10 <sup>5</sup>   | 89.74(17) | C11-Fe1-N3  | 92.0(2)    |
| N9 <sup>2</sup> -Co1-N10 <sup>4</sup>   | 90.26(17) | C11-Fe1-N5  | 179.1(2)   |
| N10 <sup>4</sup> -Co1-N10 <sup>5</sup>  | 180.0     | C11-Fe1-C10 | 89.7(2)    |
| N7 <sup>1</sup> -Co2-N7 <sup>2</sup>    | 180.00(7) | N23-Fe2-N21 | 88.12(17)  |
| N7 <sup>1</sup> -Co2-N15 <sup>3</sup>   | 93.9(5)   | N19-Fe2-N23 | 89.41(18)  |
| N7 <sup>1</sup> -Co2-N15                | 86.1(5)   | N19-Fe2-N21 | 87.94(19)  |
| N7 <sup>2</sup> -Co2-N15 <sup>3</sup>   | 86.1(5)   | C33-Fe2-N23 | 92.65(19)  |
| N7 <sup>2</sup> -Co2-N15                | 93.9(5)   | C33-Fe2-N21 | 92.4(2)    |
| N16 <sup>3</sup> -Co2-N7 <sup>2</sup>   | 87.73(16) | C33-Fe2-N19 | 177.9(2)   |
| N16-Co2-N7 <sup>1</sup>                 | 87.73(16) | C33-Fe2-C32 | 88.1(2)    |
| N16 <sup>3</sup> -Co2-N7 <sup>1</sup>   | 92.27(16) | C31-Fe2-N23 | 177.7(2)   |
| N16-Co2-N7 <sup>2</sup>                 | 92.27(16) | C31-Fe2-N21 | 91.1(2)    |
| N16 <sup>3</sup> -Co2-N16               | 180.0     | C31-Fe2-N19 | 92.8(2)    |
| N16 <sup>3</sup> -Co2-N15               | 81.4(4)   | C31-Fe2-C33 | 85.2(2)    |
| N16 <sup>3</sup> -Co2-N15 <sup>3</sup>  | 98.6(4)   | C31-Fe2-C32 | 89.3(2)    |
| N16-Co2-N15 <sup>3</sup>                | 81.4(4)   | C32-Fe2-N23 | 91.5(2)    |
| N16-Co2-N15                             | 98.6(4)   | C32-Fe2-N21 | 179.4(2)   |
| N16-Co2-N15A <sup>3</sup>               | 96.3(4)   | C32-Fe2-N19 | 91.6(2)    |
| N16 <sup>3</sup> -Co2-N15A <sup>3</sup> | 83.7(4)   |             |            |
| N16-Co2-N15A                            | 83.7(4)   |             |            |
| N16 <sup>3</sup> -Co2-N15A              | 96.3(4)   |             |            |



|                              |          |  |  |
|------------------------------|----------|--|--|
| N15 -Co2 -N15 <sup>3</sup>   | 180.0(9) |  |  |
| N15A <sup>3</sup> -Co2 -N15A | 180.0(5) |  |  |

|                                         |           |               |            |
|-----------------------------------------|-----------|---------------|------------|
| Complex-1_desol                         |           |               |            |
| <b>Bond Length Å</b>                    |           |               |            |
| Co1-N9 <sup>4</sup>                     | 2.096(3)  | Fe1-N1        | 1.979(3)   |
| Co1-N9                                  | 2.096(3)  | Fe1-N3        | 1.966(3)   |
| Co1-N18 <sup>5</sup>                    | 2.137(3)  | Fe1-N5        | 1.989(3)   |
| Co1-N18 <sup>6</sup>                    | 2.137(3)  | Fe1-C12       | 1.896(4)   |
| Co1-N10                                 | 2.122(3)  | Fe1-C10       | 1.916(4)   |
| Co1-N10 <sup>4</sup>                    | 2.122(3)  | Fe1-C11       | 1.924(4)   |
| Co2-N7 <sup>1</sup>                     | 2.120(3)  | Fe2-N21       | 1.980(3)   |
| Co2-N7 <sup>2</sup>                     | 2.120(3)  | Fe2-N19       | 1.990(3)   |
| Co2-N16                                 | 2.096(3)  | Fe2-N23       | 1.978(3)   |
| Co2-N16 <sup>3</sup>                    | 2.096(3)  | Fe2-C33       | 1.914(4)   |
| Co2-N15                                 | 2.133(3)  | Fe2-C31       | 1.911(4)   |
| Co2-N15 <sup>3</sup>                    | 2.133(3)  | Fe2-C32       | 1.937(5)   |
| <b>Bond Angle (°)</b>                   |           |               |            |
| N10 -Co1- N10 <sup>1</sup>              | 180.0     | N1 -Fe1- N5   | 87.75(12)  |
| N10 <sup>1</sup> -Co1 -N18              | 90.55(11) | N3 -Fe1 -N5   | 87.75(12)  |
| N10 -Co1 -N18                           | 89.45(11) | N3 -Fe1 -N1   | 89.78(12)  |
| N10 <sup>1</sup> -Co1 -N18 <sup>1</sup> | 89.45(11) | C10 -Fe1 -N5  | 91.69(14)  |
| N10 -Co1 -N18 <sup>1</sup>              | 90.55(11) | C10 -Fe1 -N1  | 92.93(14)  |
| N9 -Co1- N10                            | 89.64(12) | C10 -Fe1 -N3  | 177.21(14) |
| N9 <sup>1</sup> -Co1- N10               | 90.36(12) | C10 -Fe1- C11 | 87.44(15)  |
| N9 -Co1- N10 <sup>1</sup>               | 90.36(12) | C11 -Fe1- N5  | 179.11(15) |
| N9 <sup>1</sup> -Co1- N10 <sup>1</sup>  | 89.64(12) | C11 -Fe1- N1  | 92.16(14)  |
| N9 <sup>1</sup> -Co1- N9                | 180.0     | C11 -Fe1- N3  | 93.13(14)  |
| N9 -Co1- N18 <sup>1</sup>               | 88.70(11) | C12 -Fe1 -N5  | 90.93(14)  |
| N9 <sup>1</sup> -Co1- N18 <sup>1</sup>  | 91.30(11) | C12 -Fe1- N1  | 177.90(15) |
| N9 -Co1- N18                            | 91.30(11) | C12 -Fe1- N3  | 91.81(14)  |
| N9 <sup>1</sup> -Co1- N18               | 88.70(11) | C12 -Fe1- C10 | 85.47(15)  |
| N18 -Co1- N18 <sup>1</sup>              | 180.00(4) | C12 -Fe1- C11 | 89.13(15)  |
| N7 <sup>2</sup> -Co2- N7                | 180.0     | N21 -Fe2- N20 | 88.99(12)  |
| N7 -Co2- N15 <sup>3</sup>               | 90.51(12) | N23 -Fe2- N21 | 88.26(12)  |
| N7 -Co2- N15 <sup>4</sup>               | 89.49(12) | N23 -Fe2- N20 | 87.62(13)  |
| N7 <sup>2</sup> -Co2- N15 <sup>4</sup>  | 90.51(12) | C31 -Fe2- N21 | 177.27(14) |
| N7 <sup>2</sup> -Co2- N15 <sup>3</sup>  | 89.49(12) | C31 -Fe2- N20 | 88.92(13)  |
| N15 <sup>3</sup> -Co2- N15 <sup>4</sup> | 180.0     | C31 -Fe2- N23 | 89.90(15)  |
| N16 <sup>2</sup> -Co2- N7               | 88.26(12) | C31 -Fe2- C33 | 85.50(14)  |
| N16 <sup>2</sup> -Co2- N7 <sup>2</sup>  | 91.74(12) | C31 -Fe2- C32 | 90.89(16)  |
| N16 -Co2- N7                            | 91.74(12) | C33 -Fe2- N21 | 96.54(13)  |
| N16 -Co2- N7 <sup>2</sup>               | 88.26(12) | C33 -Fe2- N20 | 174.25(13) |
| N16 <sup>2</sup> -Co2- N15 <sup>4</sup> | 89.51(12) | C33 -Fe2- N23 | 90.94(14)  |
| N16 <sup>2</sup> -Co2- N15 <sup>3</sup> | 90.49(12) | C33 -Fe2- C32 | 89.72(16)  |
| N16 -Co2- N15 <sup>3</sup>              | 89.52(12) | C32 -Fe2- N21 | 90.93(14)  |
| N16 -Co2- N15 <sup>4</sup>              | 90.48(12) | C32 -Fe2- N20 | 91.80(14)  |
| N16 <sup>2</sup> -Co2- N16              | 180.0     | C32 -Fe2- N23 | 179.01(13) |

**Table S3.** Average bond lengths (Å) around Co and Fe centres at 103 K and 245 K of complex  $1 \cdot 3.5\text{H}_2\text{O}$

| Bond  | 103 K    | 245 K    |
|-------|----------|----------|
| Co1-N | 2.087(5) | 2.111(4) |
| Co2-N | 2.084(5) | 2.126(4) |
| Fe1-C | 1.906(6) | 1.910(6) |
| Fe1-N | 1.967(5) | 1.971(4) |
| Fe2-C | 1.919(6) | 1.913(6) |
| Fe2-N | 1.967(5) | 1.968(5) |

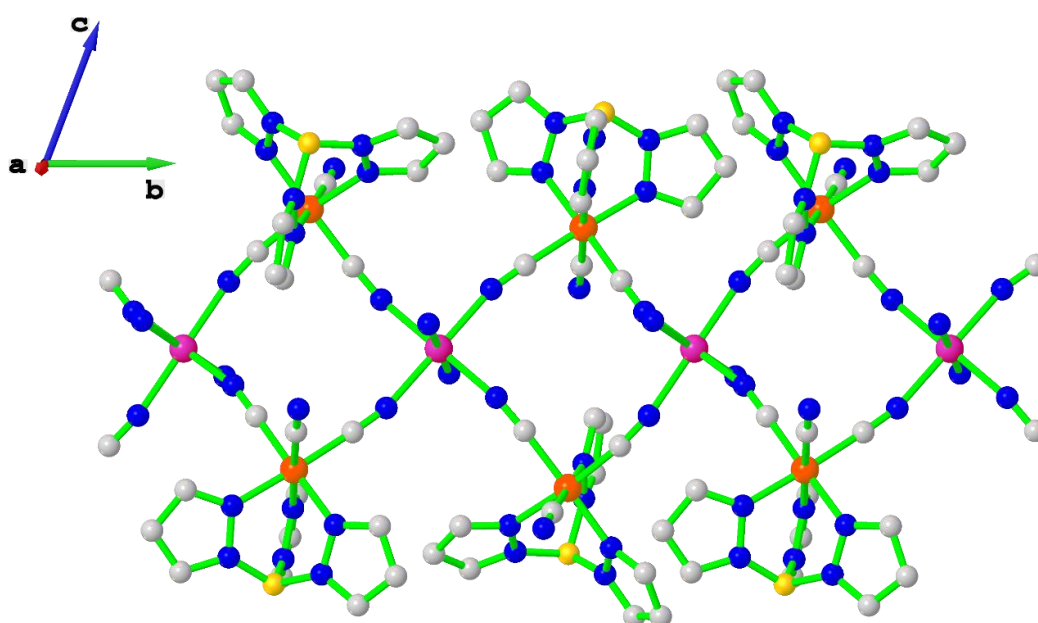

**Figure S6.** View of the 1D chain of  $\{[\text{Fe}^{\text{III}}\text{Tp}(\text{CN})_3]_2[\text{Co}(\text{L}_2)]\}_n \cdot 3.5\text{H}_2\text{O}$  along the crystallographic  $a$  axis extending in the direction of  $b$  axis. Colour code: Fe (orange), Co (pink), C (grey), O (red) and N (blue).

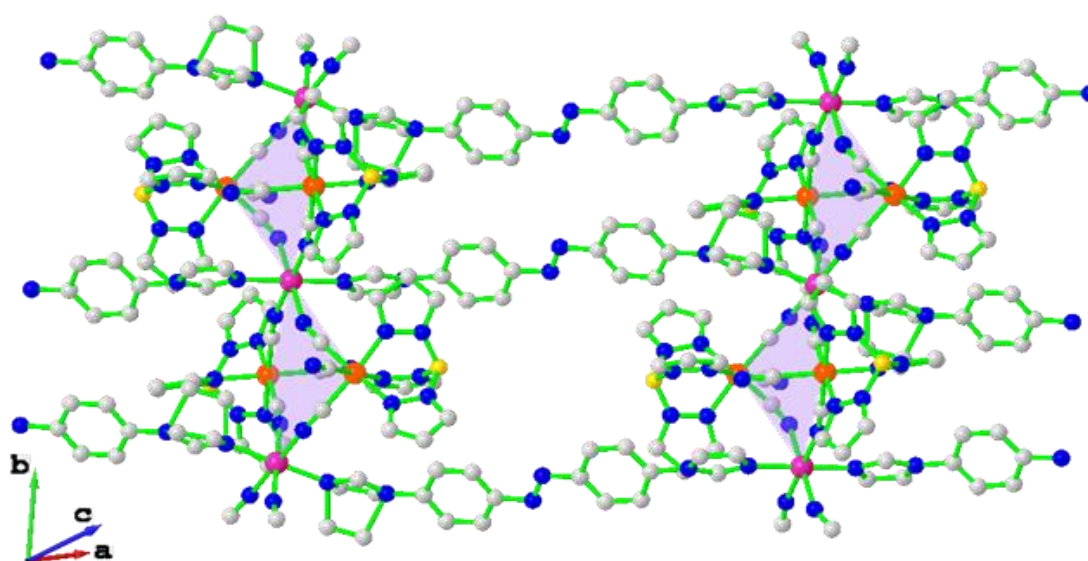

**Figure S7.** The 2D sheet of  $\{[\text{Fe}^{\text{III}}\text{Tp}(\text{CN})_3]_2[\text{Co}(\text{L}_2)]\}_n \cdot 3.5\text{H}_2\text{O}$  formed by interlinking the 1D zig-zag chain structure along the  $a$  axis. Colour code: Fe (orange), Co (pink), C (grey), O (red) and N (blue).

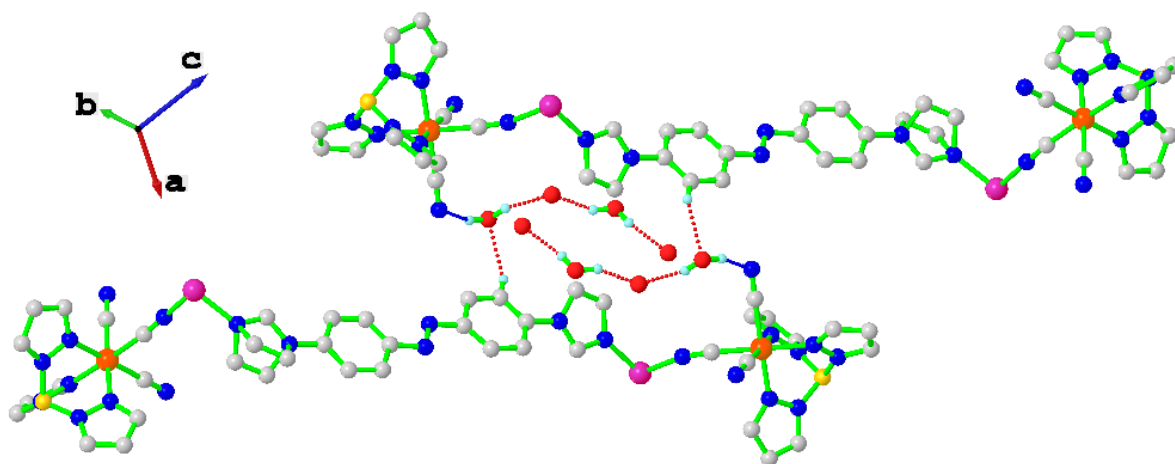

**Figure S8.** Hydrogen bonding interactions between the water molecules and terminal cyanide groups of  $\{[\text{Fe}^{\text{III}}\text{Tp}(\text{CN})_3]_2[\text{Co}(\text{L}_2)]\}_n \cdot 3.5\text{H}_2\text{O}$  at 103 K. Colour code: Fe (orange), Co (pink), C (grey), O (red) and N (blue).

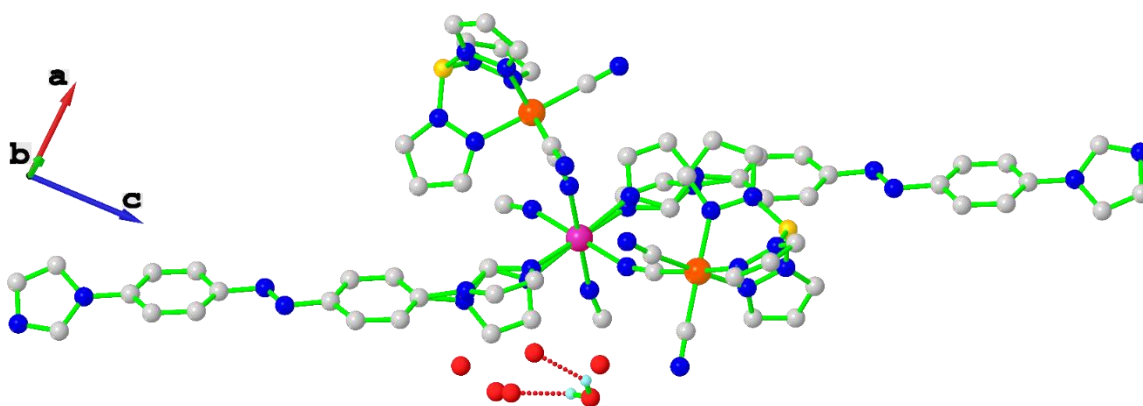

**Figure S9.** Hydrogen bonding interactions in the framework of  $\{[\text{Fe}^{\text{III}}\text{Tp}(\text{CN})_3]_2[\text{Co}(\text{L}_2)]\}_n \cdot 3.5\text{H}_2\text{O}$  at 245 K. Colour code: Fe (orange), Co (pink), C (grey), O (red) and N (blue).

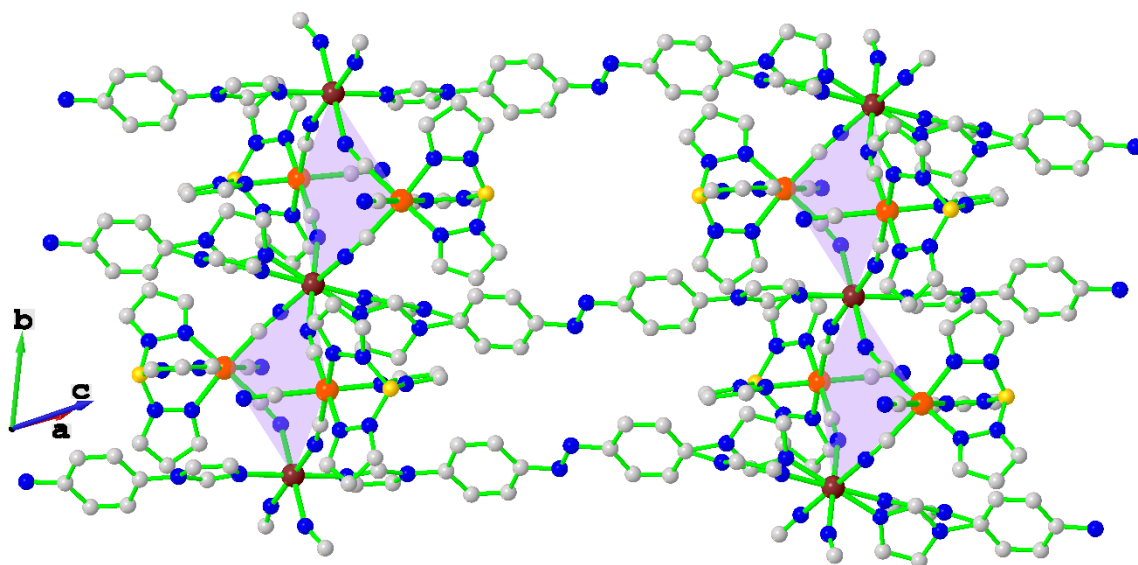

**Figure S10.** The 2D sheet of  $\{[\text{Fe}^{\text{III}}\text{Tp}(\text{CN})_3]_2[\text{Zn}(\text{L}_2)]\}_n \cdot 3.5\text{H}_2\text{O}$  (**2**) formed by interlinking the 1D zig-zag chain structure along the  $a$  axis. Colour code: Fe (orange), Zn (maroon), C (grey), O (red) and N (blue).

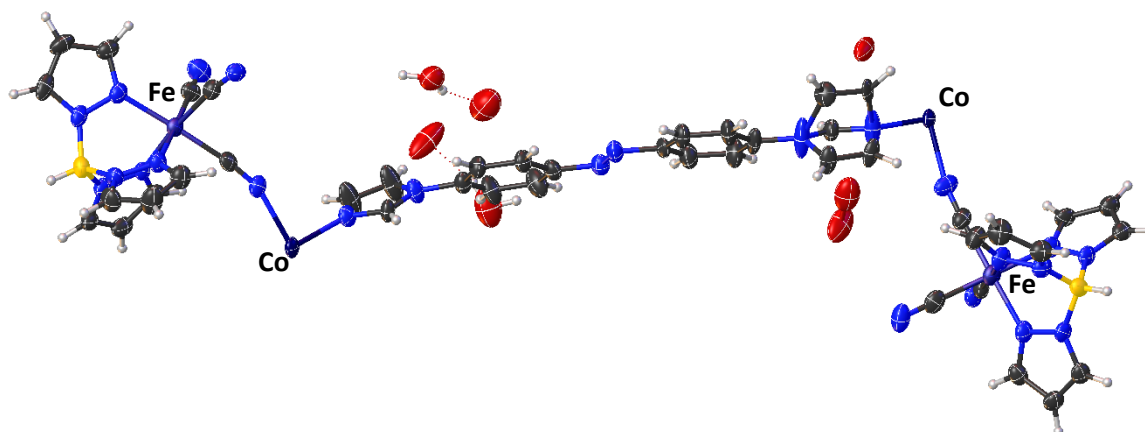

**Figure S11.** Thermal ellipsoid plot (50% probability) of  $\{[\text{Fe}^{\text{III}}\text{Tp}(\text{CN})_3]_2[\text{Co}(\text{L}_2)]\}_n \cdot 3.5\text{H}_2\text{O}$  at 103 K. Colour code: Fe (blue), Co (dark blue), C (grey), O (red) and N (light blue).

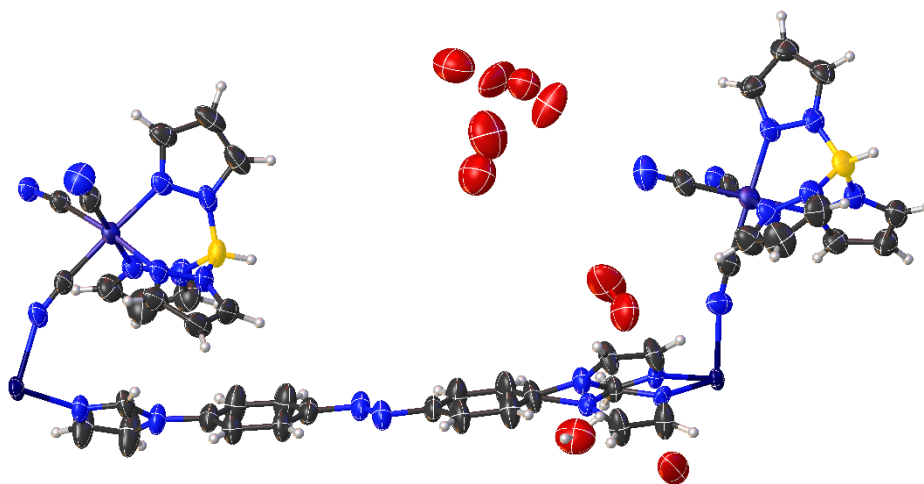

**Figure S12.** Thermal ellipsoid plot (50% probability) of  $\{[\text{Fe}^{\text{III}}\text{Tp}(\text{CN})_3]_2[\text{Co}(\text{L}_2)]\}_n \cdot 3.5\text{H}_2\text{O}$  at 245 K. Colour code: Fe (blue), Co (dark blue), C (grey), O (red) and N (light blue).

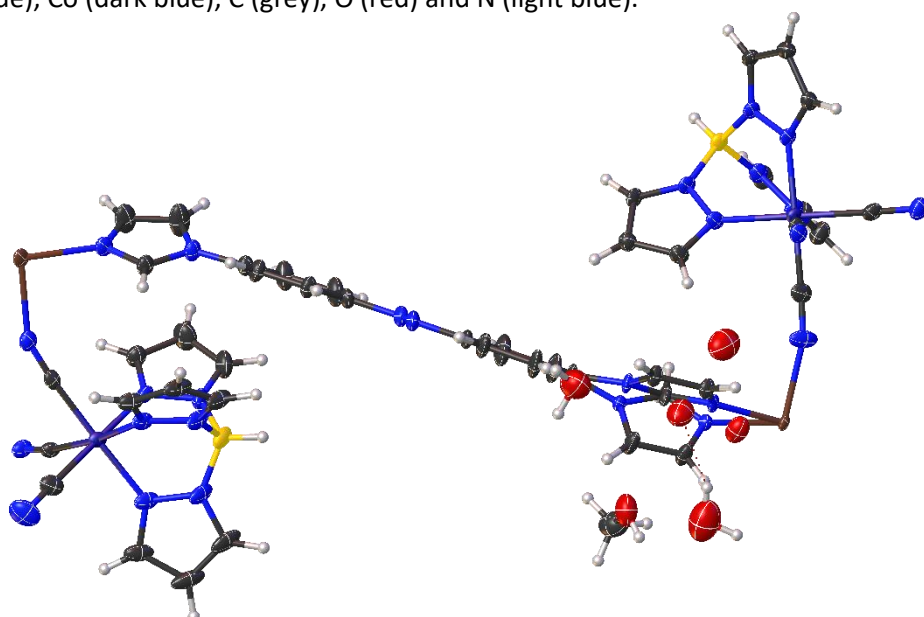

**Figure S13.** Thermal ellipsoid plot (50% probability) of  $\{[\text{Fe}^{\text{III}}\text{Tp}(\text{CN})_3]_2[\text{Zn}(\text{L}_2)]\}_n \cdot 3.5\text{H}_2\text{O}$ . Colour code: Fe (blue), Zn (brown), C (grey), O (red) and N (light blue).

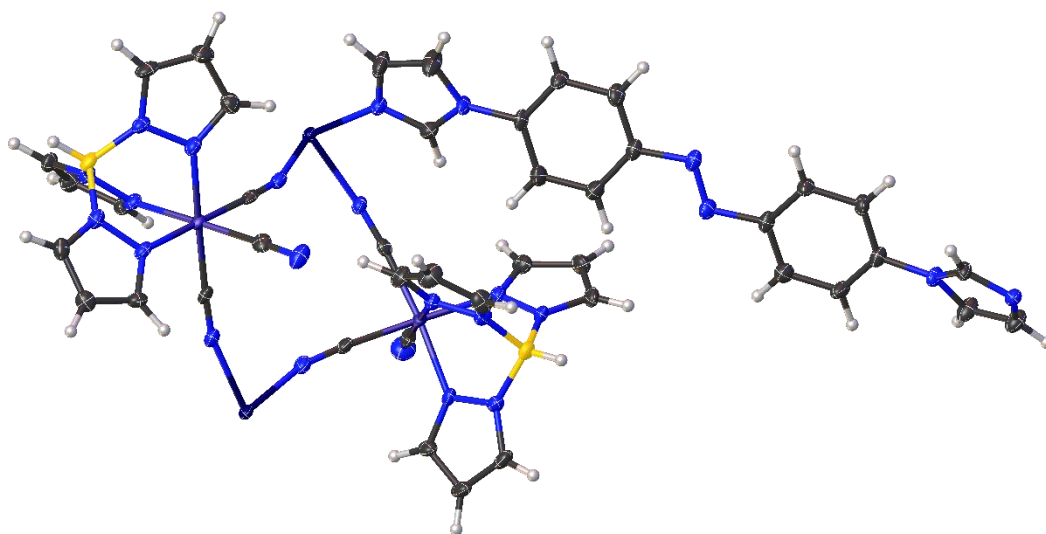

**Figure S14.** Thermal ellipsoid plot (50% probability) of  $\{[\text{Fe}^{\text{III}}\text{Tp}(\text{CN})_3][\text{Co}(\text{L}_2)]\}_n$  at 100 K. Colour code: Fe (blue), Co (dark blue), C (grey), O (red) and N (light blue). The absence of solvent molecules eliminates the disorder as indicated by the thermal ellipsoid as compared to S12 and S13

### 3.6. Mössbauer Studies:

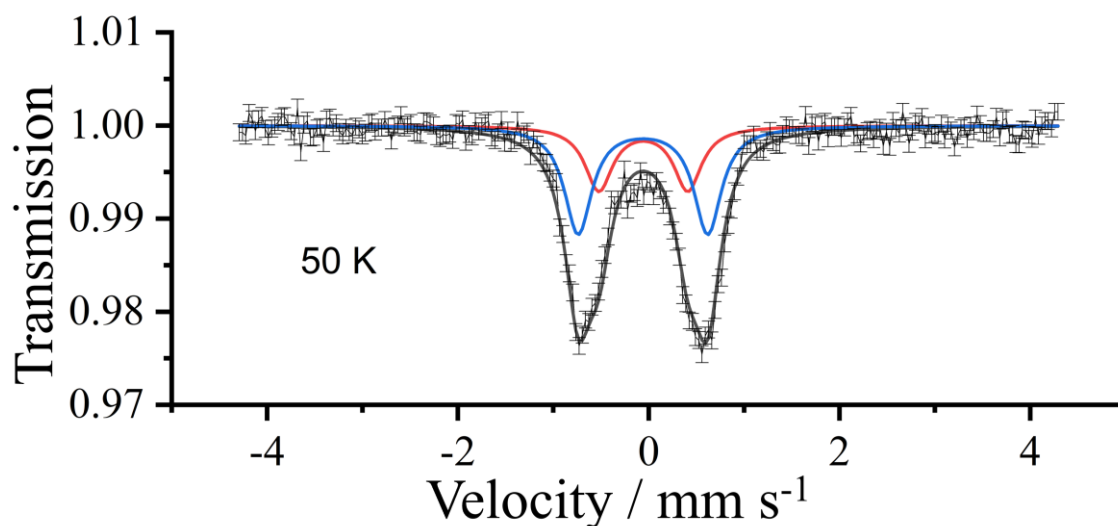

**Figure S15.**  $^{57}\text{Fe}$  Mössbauer spectra at 50 K. Mössbauer parameters:  $\delta = -0.06$  and  $\Delta E_Q = 1.36 \text{ mm s}^{-1}$ , corresponds to LS  $\text{Fe}^{\text{III}}$ ;  $\delta = -0.06$  and  $\Delta E_Q = 0.93 \text{ mm s}^{-1}$ , corresponds to the LS  $\text{Fe}^{\text{II}}$ . The  $\text{Fe}^{\text{III}}/\text{Fe}^{\text{II}}$  peak area ratio was 0.63/0.37, suggesting a mixture of  $\{\text{Fe}^{\text{III}}_{\text{LS}}(\mu\text{-CN})\text{Co}^{\text{II}}_{\text{HS}}(\mu\text{-NC})\text{Fe}^{\text{III}}_{\text{LS}}\}$  and  $\{\text{Fe}^{\text{II}}_{\text{LS}}(\mu\text{-CN})\text{Co}^{\text{III}}_{\text{LS}}(\mu\text{-NC})\text{Fe}^{\text{III}}_{\text{LS}}\}$  linkages. The solid lines are Lorentzian curves plotted by the calculated values. The Mössbauer studies was performed on the product obtained via direct mixing of the reactant which exhibit higher extent of magnetic transition than the crystal product obtained by slow diffusion technique (Fig S19).

### 3.7. Shape Analysis:

**Table S4.** Summary of SHAPE analysis around Co in complex **1**·3.5H<sub>2</sub>O at 103K

|    |             |           |                               | <b>Co1</b>   | <b>Co2</b>   |
|----|-------------|-----------|-------------------------------|--------------|--------------|
| 1. | HP-6        | D6h       | Hexagon                       | 32.406       | 31.658       |
| 2. | PPY-6       | C5v       | Pentagonal pyramid            | 29.919       | 29.498       |
| 3. | <b>OC-6</b> | <b>Oh</b> | <b>Octahedron</b>             | <b>0.013</b> | <b>0.057</b> |
| 4. | TPR-6       | D3h       | Trigonal prism                | 16.553       | 16.371       |
| 5. | JPPY-6      | C5v       | Johnson pentagonal pyramid J2 | 33.400       | 32.882       |

**Table S5.** Summary of SHAPE analysis around Co in complex **1**·3.5H<sub>2</sub>O at 245 K

|    |             |           |                               | <b>Co1</b>   | <b>Co2</b>   |
|----|-------------|-----------|-------------------------------|--------------|--------------|
| 1. | HP-6        | D6h       | Hexagon                       | 32.543       | 29.276       |
| 2. | PPY-6       | C5v       | Pentagonal pyramid            | 29.970       | 28.404       |
| 3. | <b>OC-6</b> | <b>Oh</b> | <b>Octahedron</b>             | <b>0.014</b> | <b>0.256</b> |
| 4. | TPR-6       | D3h       | Trigonal prism                | 16.556       | 16.180       |
| 5. | JPPY-6      | C5v       | Johnson pentagonal pyramid J2 | 33.451       | 31.581       |

**Table S6.** Summary of SHAPE analysis around Co in complex **1** at 100 K

|    |             |           |                               | <b>Co1</b>   | <b>Co2</b>   |
|----|-------------|-----------|-------------------------------|--------------|--------------|
| 1. | HP-6        | D6h       | Hexagon                       | 32.479       | 32.671       |
| 2. | PPY-6       | C5v       | Pentagonal pyramid            | 29.859       | 29.956       |
| 3. | <b>OC-6</b> | <b>Oh</b> | <b>Octahedron</b>             | <b>0.018</b> | <b>0.023</b> |
| 4. | TPR-6       | D3h       | Trigonal prism                | 16.572       | 16.436       |
| 5. | JPPY-6      | C5v       | Johnson pentagonal pyramid J2 | 33.289       | 33.392       |

**Table S7.** The fit parameters for the linear fitting of  $\ln(\tau)$  vs.  $T^{-1}$  for complex **1**·3.5H<sub>2</sub>O and **1**

| Complex                 | <b>1</b> ·3.5H <sub>2</sub> O | <b>1</b>                |
|-------------------------|-------------------------------|-------------------------|
| Equation                | $y = a + b \cdot x$           | $y = a + b \cdot x$     |
| Intercept               | $-17.3628 \pm 0.28976$        | $-18.35451 \pm 0.78307$ |
| Slope                   | $34.89463 \pm 0.88176$        | $32.61178 \pm 1.96253$  |
| Residual Sum of Squares | 0.02482                       | 0.52351                 |
| Pearson's r             | 0.99873                       | 0.99107                 |
| R-Square (COD)          | 0.99745                       | 0.98221                 |
| Adj. R-Square           | 0.99682                       | 0.97866                 |

**Table S8.** The fit parameters for the linear fitting of  $\ln(\chi^2 T)$  vs.  $T^{-1}$  for complex **1**·3.5H<sub>2</sub>O and **1**

| Complex                 | <b>1</b> ·3.5H <sub>2</sub> O | <b>1</b>               |
|-------------------------|-------------------------------|------------------------|
| Equation                | $y = a + b \cdot x$           | $y = a + b \cdot x$    |
| Intercept               | $1.62452 \pm 0.01309$         | $2.10389 \pm 0.0151$   |
| Slope                   | $22.27239 \pm 0.1708$         | $23.16861 \pm 0.16998$ |
| Residual Sum of Squares | 0.04043                       | 0.01782                |
| Pearson's r             | 0.99827                       | 0.9993                 |
| R-Square (COD)          | 0.99654                       | 0.9986                 |
| Adj. R-Square           | 0.99648                       | 0.99855                |

**Table S9.** Fe-Co based SCMs exhibiting ETCST phenomenon

| Compound                                                                                                                                | Stimuli for ETCST | Ref. |
|-----------------------------------------------------------------------------------------------------------------------------------------|-------------------|------|
| $\{[\text{Fe}(\text{pzTp})(\text{CN})_3]_2\text{Co}(4\text{-styrylpyridine})_2\} \cdot 2\text{H}_2\text{O} \cdot 2\text{CH}_3\text{OH}$ | Light             | 9    |
| $\{[\text{Fe}(\text{bpy})(\text{CN})_4]_2\text{Co}(4,4'\text{-bipyridine})\} \cdot 4\text{H}_2\text{O}$                                 | Light             | 10   |
| $\{[\text{Fe}(\text{bpy})(\text{CN})_4]_2\text{Co}(\text{phpy})_2\} \cdot 2\text{H}_2\text{O}$                                          | Light             | 11   |
| $[\text{Co}(\text{R-pabn})][\text{Fe}(\text{Tp})(\text{CN})_3](\text{BF}_4) \cdot \text{H}_2\text{O}$                                   | Light             | 12   |
| $\{[\text{Fe}(\text{bipy})(\text{CN})_4]_2[\text{Co}(\text{phpy})_2]\}$                                                                 | Dehydration       | 13   |
| $\{[\text{Fe}^{\text{III}}(\text{bipy})(\text{CN})_4]_2\text{Co}^{\text{II}}(2,4'\text{-bpy})_2\}$                                      | Light             | 14   |
| $\{[\text{pzTpFe}(\text{CN})_3]_4\text{Co}_2(\text{Bib})_4\} \cdot 3\text{H}_2\text{O}$                                                 | Light             | 15   |
| $\{[\text{pzTpFe}(\text{CN})_3]_2\text{Co}(\text{Bpi})_2\} \cdot \text{CH}_3\text{CN} \cdot 4\text{H}_2\text{O}$                        | Light             | 15   |
| $\{[(\text{PzTp})\text{Fe}(\text{CN})_3]_2\text{Co}(\text{L})_2\} \cdot 4\text{H}_2\text{O}$                                            | Light             | 16   |
| $\{[(\text{Tp})\text{Fe}(\text{CN})_3]_2\text{Co}(\text{L})_2\} \cdot 3\text{H}_2\text{O} \cdot \text{CH}_3\text{OH}$                   | Light             | 16   |
| $\{[(\text{Tp})\text{Fe}(\text{CN})_3]_2\text{Co}(\text{BIT})\} \cdot 2\text{CH}_3\text{OH}$                                            | Light             | 17   |

L: (4-(1H-imidazol-5-ylmethylene-amino)-4H-1,2,4-triazole; Phpy: Phenyl pyridine; Bib: 1,4-bis-(1H-imidazol-1-yl)benzene); Bpi: 1-Biphenyl-4-yl-1H-imidazole; BIT: 3,4-bis-(1H-imidazol-1-yl)thiophen

### 3.8. Thermogravimetric Analysis (TGA):

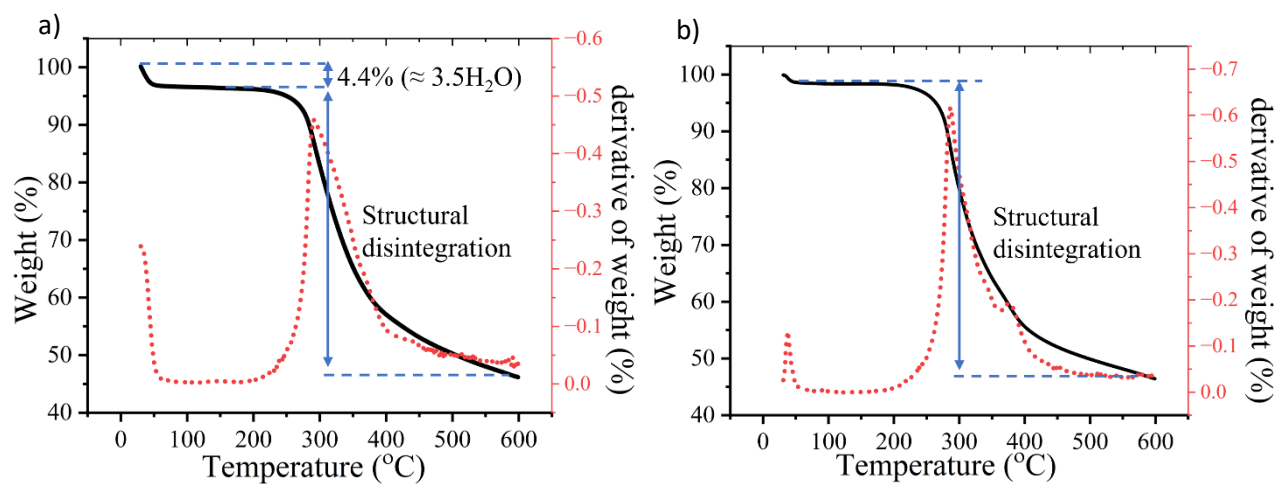

**Figure S16.** a) TGA of 1·3.5H<sub>2</sub>O depicting the solvent loss from 30 °C onwards which approximately accounts for the loss of 3.5H<sub>2</sub>O. b) TGA of 1 disintegrates above 250 °C representing a negligible loss which might be due to the moisture present on the sample surface. In both the cases the molecule

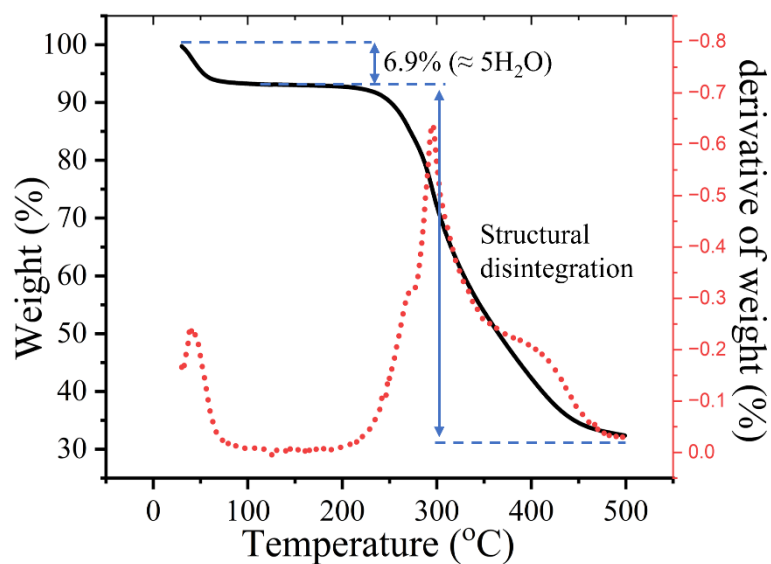

**Figure S17.** TGA of the sample prepared by direct mixing. The compound rapidly loses solvent molecules indicating the loss of approximately 5 H<sub>2</sub>O molecules. The loss above 250 °C indicates structural disintegration



### 3.9. Magnetic data:

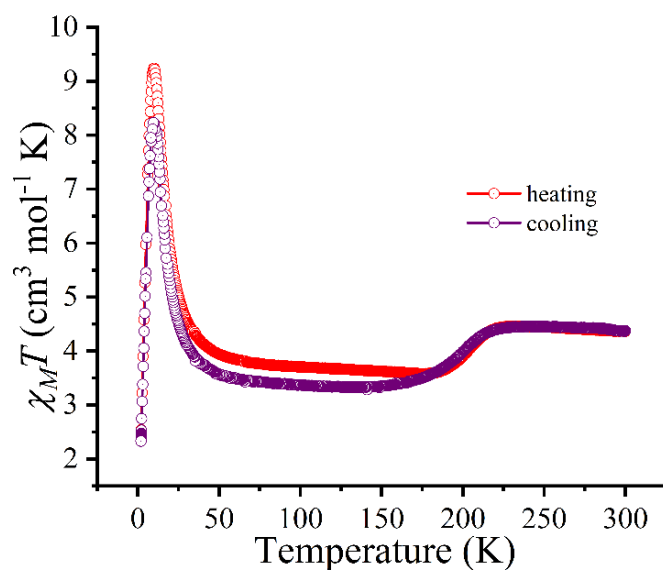

**Figure S18.**  $\chi_M T$  vs T plot for heating (2 to 300 K) and cooling (300 to 2 K) mode for complex  $1 \cdot 3.5\text{H}_2\text{O}$ .

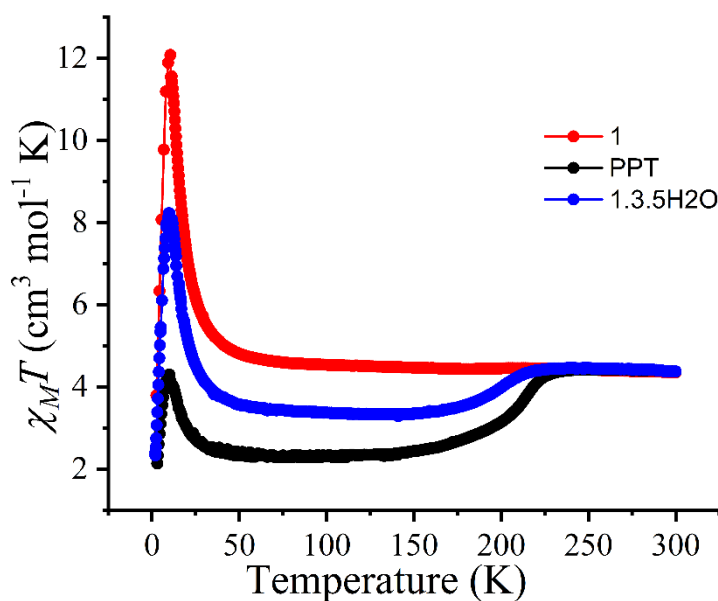

**Figure S19.**  $\chi_M T$  vs T plot for complexes  $1 \cdot 5\text{H}_2\text{O}$  (black),  $1$  (red) and  $1 \cdot 3.5\text{H}_2\text{O}$  (blue) in 2-300 K range

The amount of the  $\text{H}_2\text{O}$  molecules is directly affecting the fraction of the molecule undergoing ETCST phenomenon. The sample prepared by direct mixing exhibited higher extent of ETCST behaviour, while the transition temperature remains same. TGA analysis revealed that the weight loss corresponds to five  $\text{H}_2\text{O}$  molecules corresponding the sample to be  $1 \cdot 5\text{H}_2\text{O}$  (Fig S17). The fractional conversion for  $1 \cdot 5\text{H}_2\text{O}$  correlates with the Mössbauer data (Fig S15).

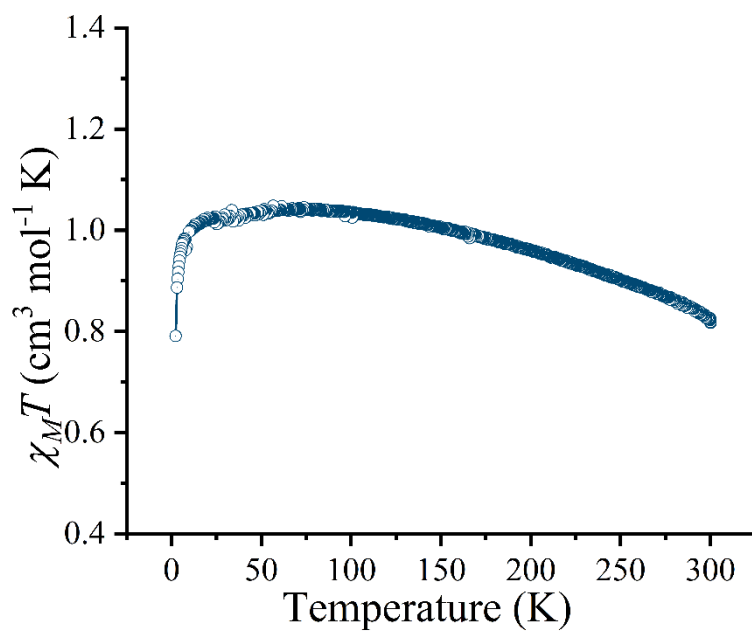

**Figure S20.**  $\chi_M T$  vs T plot indicating the absence of ETCST in complex 2.

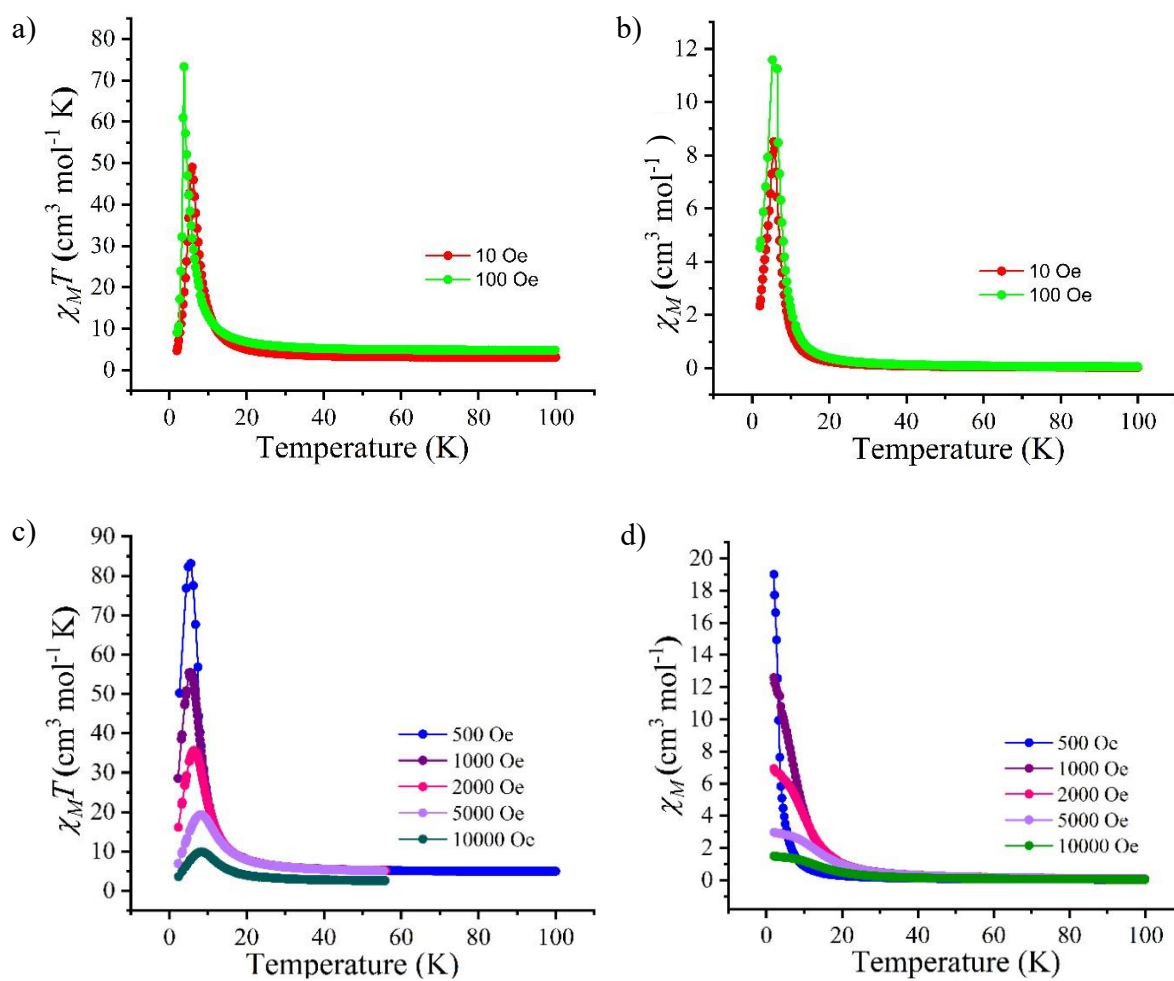

**Figure S21.** Low-temperature behaviour of  $\chi_M$  vs T and  $\chi_M T$  vs T as a function of applied field for complex 1·3.5H<sub>2</sub>O.

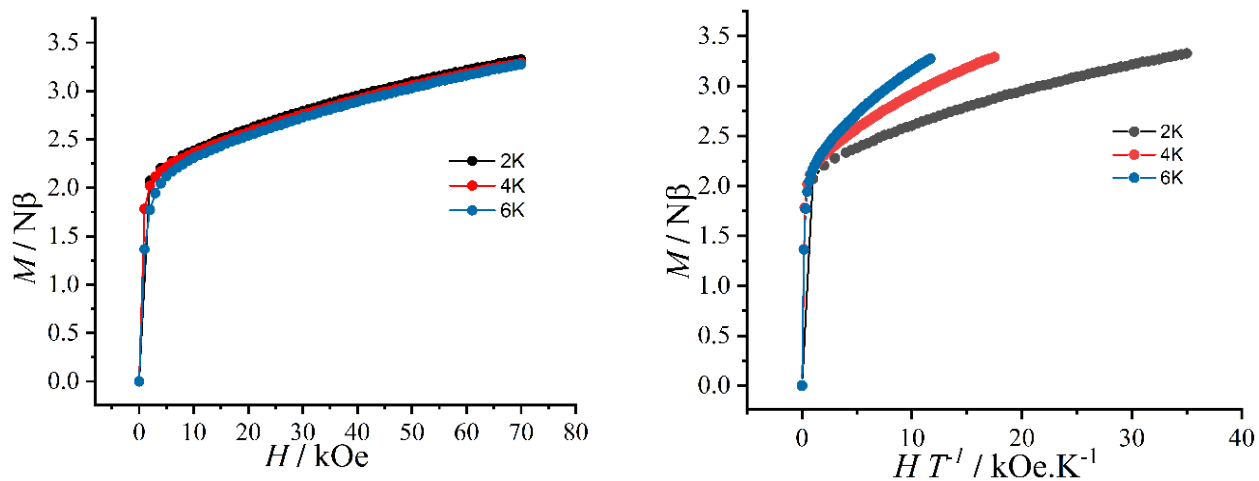

**Figure S22.** Magnetization vs magnetic field (left) and reduced magnetization (right) plots for complex  $1 \cdot 3.5H_2O$ .

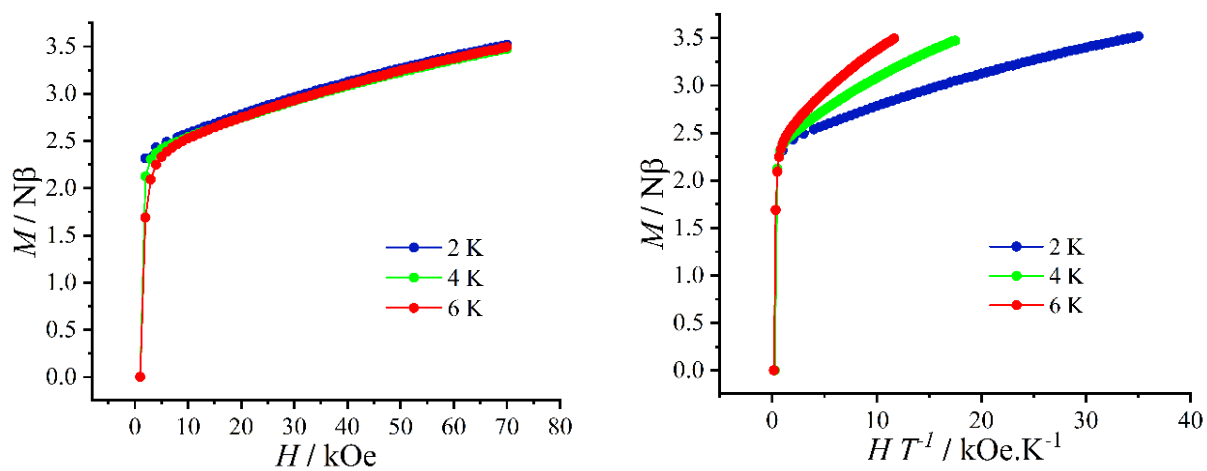

**Figure S23.** a) Magnetization vs magnetic field and b) reduced magnetization plots for complex **1**.

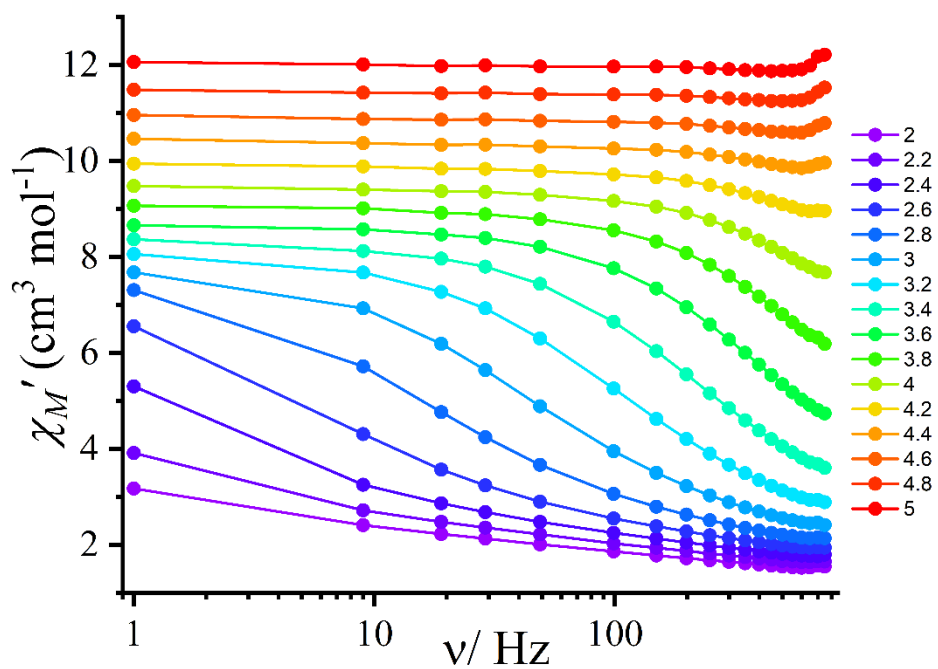

**Figure S24.** Variable-frequency in-phase ( $\chi'$ ) ac magnetic susceptibility data for **1·3.5H<sub>2</sub>O** collected in a 3.5 Oe ac field (Hac) and dc field of 0 Oe (Hdc)

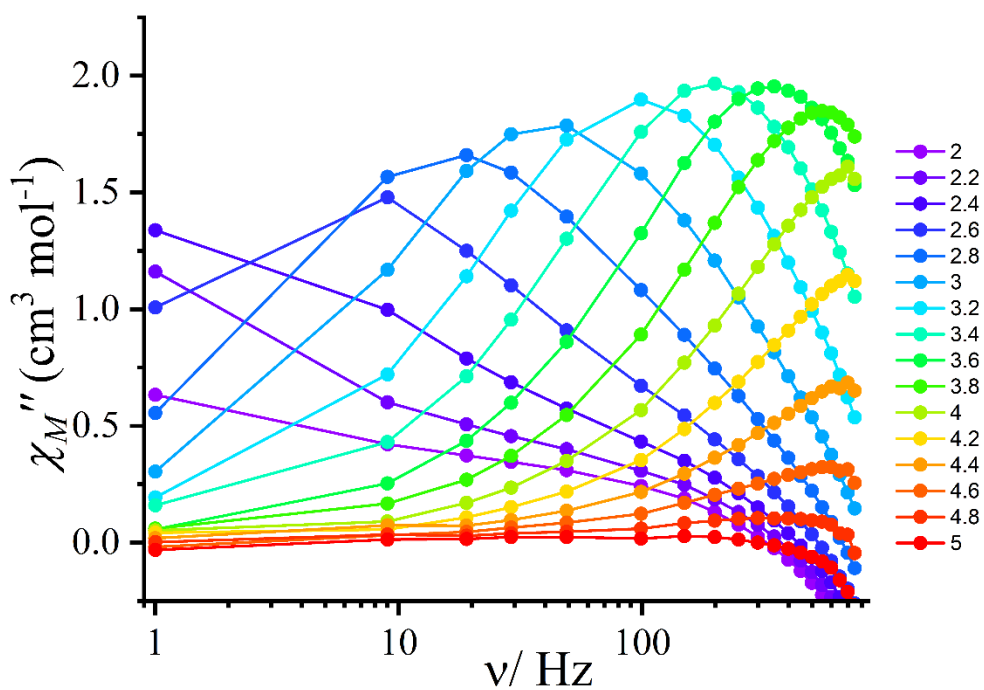

**Figure S25.** Variable-frequency out-of-phase ( $\chi''$ ) ac magnetic susceptibility data for **1·3.5H<sub>2</sub>O** collected in a 3.5 Oe ac field (Hac) and dc field of 0 Oe (Hdc)

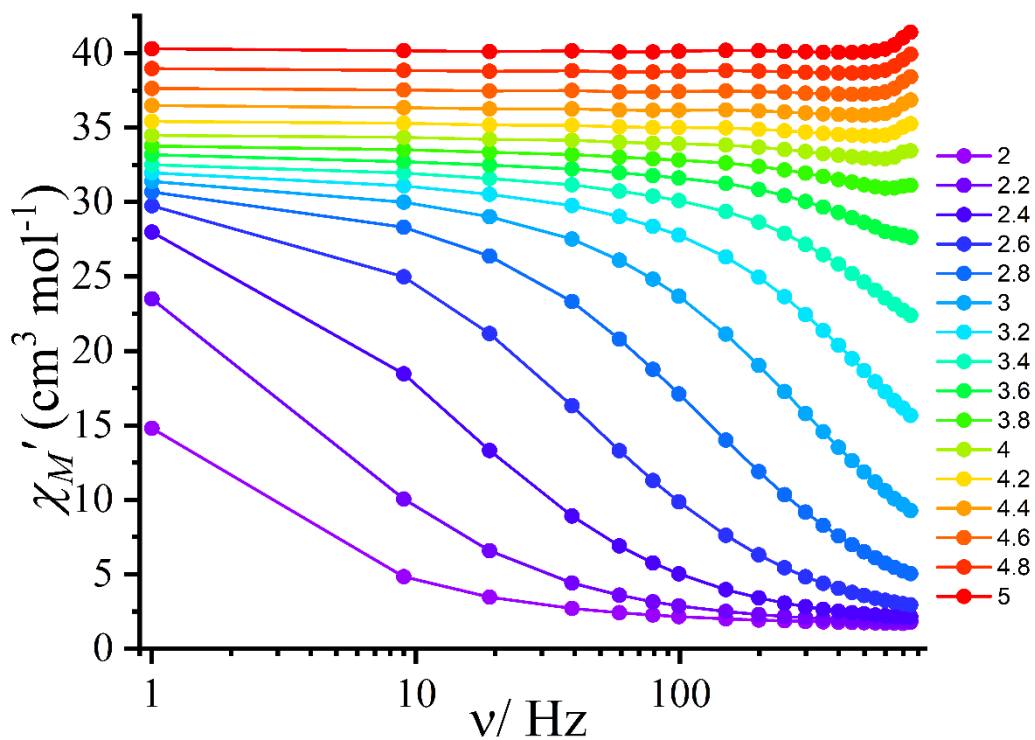

**Figure S26.** Variable-frequency in-phase ( $\chi'$ ) ac magnetic susceptibility data for **1** collected in a 3.5 Oe ac field (Hac) and dc field of 0 Oe (Hdc)

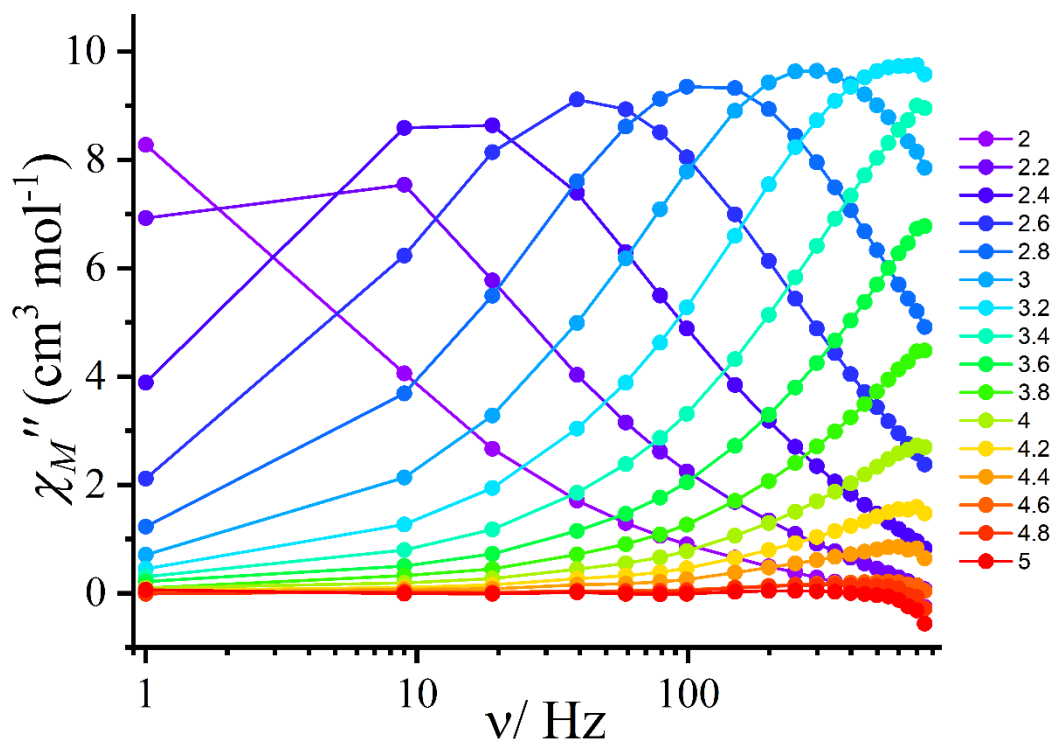

**Figure S27.** Variable-frequency out-of-phase ( $\chi''$ ) ac magnetic susceptibility data for **1** collected in a 3.5 Oe ac field (Hac) and dc field of 0 Oe (Hdc)

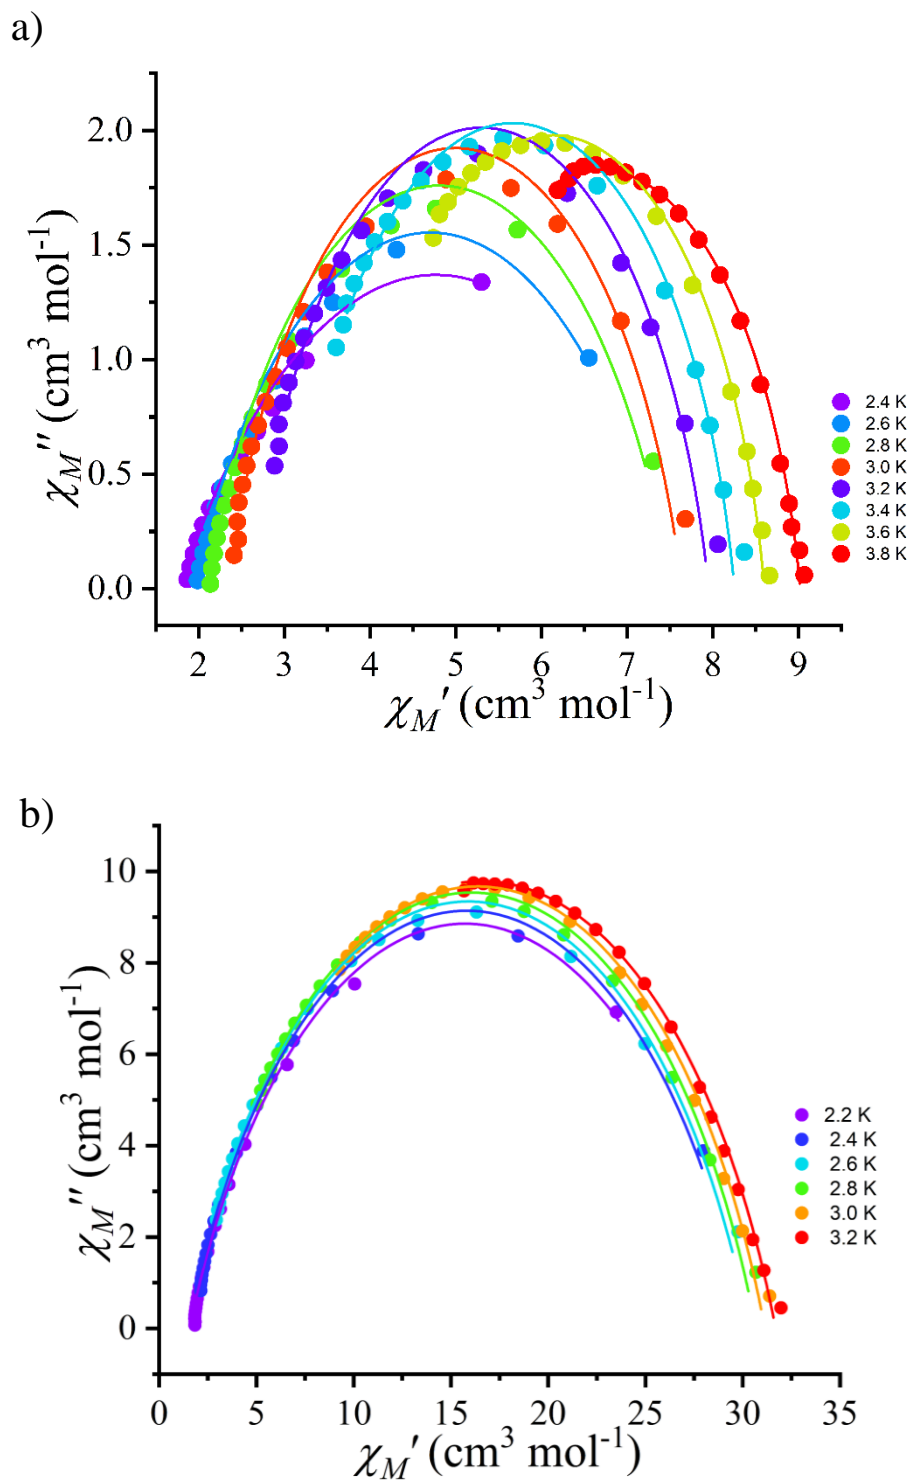

**Figure S28.** Cole–Cole plots of  $1 \cdot 3.5\text{H}_2\text{O}$  (a) and  $1$  (b); the solid lines are least-square fittings for a distribution of single relaxation processes using generalized Debye model with  $\alpha$  ranging from 0.14 to 0.45 and 0.26 to 0.28 for  $1 \cdot 3.5\text{H}_2\text{O}$  and  $1$  respectively.

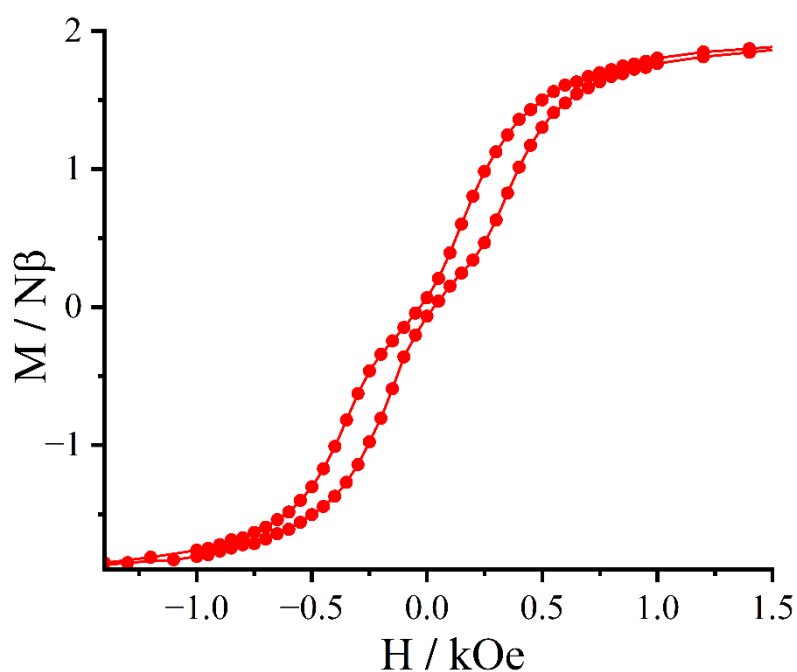

**Figure S29.** a) Hysteresis observed in the magnetization vs. magnetic field plot in a field sweep rate of 100 Oe per minute for complex **1**·3.5H<sub>2</sub>O.

## References:

1. J. Kim, S. Han, I.-K. Cho, K. Y. Choi, M. Heu, S. Yoon and B. J. Suh, *Polyhedron*, 2004, **23**, 1333-1339.
2. J. Yadav, D. J. Mondal and S. Konar, *Chem. Commun.*, 2021, **57**, 5925-5928.
3. P. Mondal, B. Dey, S. Roy, S. P. Bera, R. Nasani, A. Santra and S. Konar, *Crystal Growth & Design*, 2018, **18**, 6211-6220.
4. M. K. Sharma and P. K. Bharadwaj, *Inorg. Chem.*, 2011, **50**, 1889-1897.
5. SAINT, Data Reduction and Frame Integration Program for the CCD Area-Detector System. Bruker Analytical X-ray Systems, Madison, Wisconsin, USA, 1997-2006.
6. G.M. Sheldrick, SADABS, Program for Area Detector Adsorption Correction, Institute for Inorganic Chemistry, University of Göttingen, Germany, 1996.
7. O. V. Dolomanov, L. J. Bourhis, R. J. Gildea, J. A. K. Howard and H. Puschmann, *Journal of Applied Crystallography*, 2009, **42**, 339-341.
8. G. Sheldrick, *Acta Crystallographica Section A*, 2015, **71**, 3-8.
9. D. P. Dong, T. Liu, S. Kanegawa, S. Kang, O. Sato, C. He and C. Y. Duan, *Angew. Chem. Int.Ed.*, 2012, **51**, 5119-5123.
10. T. Liu, Y.-J. Zhang, S. Kanegawa and O. Sato, *J. Am. Chem. Soc.*, 2010, **132**, 8250-8251.
11. W. Jiang, C. Jiao, Y. Meng, L. Zhao, Q. Liu and T. Liu, *Chem. Sci.*, 2018, **9**, 617-622.

12. N. Hoshino, F. Iijima, G. N. Newton, N. Yoshida, T. Shiga, H. Nojiri, A. Nakao, R. Kumai, Y. Murakami and H. Oshio, *Nat. Chem.*, 2012, **4**, 921-926.
13. W. J. Jiang, H. H. Lu, Y. S. Meng, C. Q. Jiao and T. Liu, *Inorg. Chem. Commun.*, 2020, **112**, 107715.
14. Z. Shao, W. J. Jiang, L. Zhao, D. Liu, Y. S. Meng and T. Liu, *Inorg. Chem. Commun.*, 2023, **153**, 110727.
15. J. X. Hu, H. L. Zhu, Y. S. Meng, J. Pang, N. Li, T. Liu and X. H. Bu, *CCS. Chem.*, 2023, **5**, 865-875.
16. Q. Liu, N. T. Yao, H. Y. Sun, J. X. Hu, Y. S. Meng and T. Liu, *Inorg. Chem. Front.*, 2022, **9**, 5093-5104.
17. N.-T. Yao, L. Zhao, C. Yi, Q. Liu, Y.-M. Li, Y.-S. Meng, H. Oshio and T. Liu, *Angew. Chem. Int. Ed.*, 2022, **61**, e202115367.
